# Supplementary material for: Structure and functions of Yellow-breasted Boubou (Laniarius atroflavus) solos and duets
Source: PeerJ. 2020 Oct 21;8:e10214. doi: 10.7717/peerj.10214 (PMC7585374; doi:10.7717/peerj.10214)
Supplement: Supplemental Information 2 [file peerj-08-10214-s002.xlsx]

## Sheet: Data
Bout_No	Pair_code	HR_to_Dawn	HR_to_Dusk	Solo_or_Duet	M_or_F_solo	M_phrases	F_phrases	Phreases_in_duets	Duration	Bout_code
1	0	-1.06174	-13.5294	1	1	10	0		23.404	W
2	0	-1.02756	-13.491	1	1	4	0		8.511	W
9	0	-0.991395	-13.454	1	1	3	0		5.417	W
10	0	-0.987142	-13.4508	1	1	4	0		9.325	W
14	0	-0.940262	-13.4031	1	1	4	0		6.202	W
21	0	-0.84987	-13.3151	1	1	9	0		14.893	H
29	0	-0.760048	-13.2242	1	1	5	0		10.923	H
33	0	-0.715861	-13.1795	1	1	9	0		9.026	W
35	0	-0.648502	-13.1221	1	1	22	0		44.828	L
36	0	-0.632921	-13.0955	1	1	3	0		5.247	H
44	0	-0.555006	-13.0204	1	1	8	0		15.441	W
47	0	-0.513009	-12.9819	1	1	15	0		27.972	W
50	0	-0.476454	-12.9392	1	1	4	0		5.903	W
4	0	-0.461621	-12.299	1	1	6	0		14.415	W
52	0	-0.449493	-12.9218	1	1	19	0		40.35	L
53	0	-0.432018	-12.8935	1	0	0	5		1.155	Cs
55	0	-0.380477	-12.8459	1	1	8	0		15.529	H
6	0	-0.329417	-12.1756	1	1	24	0		46.343	L
4	0	-0.267583	-12.1031	1	1	4	0		7.79	W
56	0	-0.257376	-12.7221	1	1	6	0		12.833	H
3	0	-0.251929	-12.0379	1	1	6	0		9.538	H
5	0	-0.251897	-12.0899	1	1	8	0		16.757	W
8	0	-0.244294	-12.1133	1	1	47	0		128.498	L
5	0	-0.242787	-12.0311	1	1	6	0		18.021	H
7	0	-0.239409	-12.029	1	1	11	0		22.512	L
6	0	-0.238768	-12.0295	1	1	8	0		26.716	W
14	0	-0.233943	-12.0765	1	1	13	0		33.165	L
9	0	-0.232664	-12.0187	1	1	4	0		9.759	W
15	0	-0.217368	-12.0616	1	1	15	0		39.303	H
17	0	-0.215951	-12.0495	1	1	1	0		0.645	H
18	0	-0.214652	-12.0481	1	1	1	0		0.553	H
19	0	-0.213771	-12.0472	1	1	1	0		0.516	H
3	0	-0.206501	-12.1337	1	1	147	0		398.013	W
12	0	-0.199364	-12.0214	1	1	8	0		19.47	W
10	0	-0.197061	-12.0322	1	1	3	0		6.537	H
13	0	-0.196526	-12.0147	1	1	3	0		5.598	W
13	0	-0.186626	-12.0288	1	1	12	0		31.975	W
12	0	-0.185419	-12.0296	1	1	15	0		38.89	H
21	0	-0.178135	-12.0277	1	1	29	0		58.37	H
15	0	-0.175385	-12.0177	1	1	12	0		32.179	W
12	0	-0.17335	-11.9665	1	1	16	0		35.334	W
16	0	-0.164813	-11.9839	1	1	6	0		8.692	H
13	0	-0.162915	-11.9526	1	1	9	0		22.805	H
14	0	-0.160608	-11.9991	1	0	0	65		18.602	Q
24	0	-0.160608	-11.9991	1	0	0	65		18.602	Q
15	0	-0.15961	-11.9439	1	1	2	0		3.296	H
15	0	-0.153585	-11.9934	1	0	0	43		23.174	Q
16	0	-0.151534	-11.9862	1	0	0	11		4.88	Q
13	0	-0.151222	-12.007	1	1	9	0		80.965	L
25	0	-0.150258	-11.9894	1	1	6	0		20.915	H
18	0	-0.14987	-11.984	1	0	0	7		2.815	Q
17	0	-0.147533	-11.9857	1	1	8	0		17.406	H
18	0	-0.139565	-11.9797	1	1	8	0		24.551	H
19	0	-0.130674	-11.9826	1	1	5	0		67.108	H
20	0	-0.124785	-11.9083	1	1	1	0		0.497	H
9	0	-0.108204	-12.022	1	1	94	0		289.828	W
23	0	-0.105016	-11.9564	1	1	3	0		65.156	H
22	0	-0.103809	-11.9568	1	1	7	0		70.588	H
28	0	-0.102143	-11.9563	1	1	34	0		74.962	H
22	0	-0.0978247	-11.9371	1	1	8	0		21.246	W
34	0	-0.0916564	-11.9419	1	1	1	0		0.767	H
30	0	-0.0686939	-11.9295	1	1	43	0		98.924	L
28	0	-0.0669142	-11.9212	1	1	6	0		75.293	H
21	0	-0.0589528	-11.8562	1	1	16	0		50.043	H
29	0	-0.0576339	-11.9152	1	1	14	0		87.294	H
31	0	-0.0528403	-11.9064	1	1	5	0		72.945	H
25	0	-0.0211906	-11.8605	1	1	13	0		21.334	H
26	0	-0.0176664	-11.8535	1	1	3	0		9.133	H
27	0	-0.0143603	-11.8479	1	1	1	0		0.589	H
33	0	-0.00493528	-11.901	1	1	65	0		225.665	H
38	0	-0.00291028	-11.8425	1	1	15	0		22.67	H
39	0	0.00103444	-11.8342	1	1	3	0		6.813	H
40	0	0.00259333	-11.8316	1	1	2	0		2.983	L
41	0	0.00713361	-11.8305	1	1	8	0		15.394	H
63	0	0.0116189	-12.4526	1	1	6	0		11.079	H
18	0	0.0182878	-11.8136	1	1	22	0		54.684	L
21	0	0.0334106	-11.797	2		24	18	42	49.378	KL
44	0	0.04139	-11.8138	1	1	33	0		78.671	L
46	0	0.0554883	-11.791	1	1	21	0		47.459	L
45	0	0.0565761	-11.8122	1	1	50	0		127.754	H
48	0	0.0609583	-11.7753	1	1	5	0		10.57	L
66	0	0.0616533	-12.4134	2		26	22	48	50.317	LC
29	0	0.0730672	-11.7694	1	1	14	0		32.71	H
67	0	0.0761919	-12.3869	1	1	4	0		7.287	H
22	0	0.0803539	-11.7524	2		22	17	39	58.065	KL
48	0	0.0838972	-11.7739	2		19	17	36	88.034	LC
26	0	0.0888006	-11.7044	1	1	16	0		35.435	H
68	0	0.0941281	-12.3689	1	1	4	0		6.859	H
33	0	0.0976583	-11.7504	1	1	25	0		53.032	W
25	0	0.105294	-11.7151	2		6	5	11	13.485	LK
36	0	0.105619	-11.7293	1	1	3	0		5.782	W
27	0	0.119979	-11.6704	2		10	2	12	25.372	HK
52	0	0.132302	-11.7213	1	1	6	0		73	H
72	0	0.147027	-12.3198	2		12	15	27	20.448	WC
57	0	0.148711	-11.6913	1	1	15	0		24.188	L
29	0	0.153245	-11.6328	1	1	5	0		9.686	H
73	0	0.154277	-12.3124	2		10	10	20	20.018	WC
57	0	0.157623	-11.6939	1	1	3	0		65.322	W
58	0	0.160109	-11.6925	1	1	5	0		69.446	H
31	0	0.165733	-11.6201	1	1	7	0		9.078	L
61	0	0.177351	-11.6747	1	1	3	0		67.531	H
32	0	0.179023	-11.607	1	1	7	0		9.723	H
64	0	0.199952	-11.6608	1	1	17	0		98.847	H
42	0	0.200185	-11.6352	1	1	4	0		7.237	L
75	0	0.203251	-12.2662	2		17	7	24	29.932	HC
43	0	0.217688	-11.6196	1	1	9	0		14.363	H
30	0	0.237274	-11.587	1	1	17	0		27.332	H
36	0	0.240662	-11.5492	1	1	13	0		23.357	L
31	0	0.246144	-11.5749	2		7	12	19	15.669	CsHK
73	0	0.253766	-11.611	1	1	33	0		113.028	H
87	0	0.254784	-12.2177	2		24	16	40	40.785	HC
32	0	0.256726	-11.5642	2		7	6	13	15.474	HK
37	0	0.264611	-11.5229	1	1	7	0		14.915	H
89	0	0.265116	-12.2016	2		8	4	12	20.263	HC
75	0	0.266382	-11.5954	1	1	18	0		102.264	H
38	0	0.266932	-11.5178	1	1	5	0		5.156	W
72	0	0.271261	-11.5702	1	1	20	0		29.376	L
47	0	0.277765	-11.5636	1	1	19	0		28.916	H
51	0	0.291778	-11.5512	1	1	17	0		34.758	H
81	0	0.302339	-11.555	2		12	5	17	86.46	HC
79	0	0.304027	-11.5802	1	1	42	0		183.159	H
53	0	0.306583	-11.5328	1	1	9	0		21.927	H
82	0	0.316731	-11.5465	1	1	25	0		107.56	W
54	0	0.317644	-11.5248	1	1	12	0		32.707	H
74	0	0.317813	-11.5204	1	1	18	0		17.604	W
76	0	0.319481	-11.5144	1	1	2	0		1.823	W
56	0	0.320541	-11.5162	1	1	5	0		12.19	H
104	0	0.323785	-12.1437	2		8	5	13	22.869	HC
84	0	0.326072	-11.5316	1	1	13	0		87.774	W
86	0	0.334626	-11.5224	1	1	10	0		85.356	W
77	0	0.334695	-11.5086	1	1	14	0		36.033	H
41	0	0.343047	-11.4483	1	1	11	0		28.884	H
34	0	0.358019	-11.4668	1	1	12	0		29.405	H
68	0	0.369498	-11.4814	1	1	2	0		3.189	H
67	0	0.371283	-11.4837	1	1	8	0		18.111	L
65	0	0.376973	-11.4575	1	1	2	0		4.107	H
45	0	0.379657	-11.4083	1	1	9	0		16.646	L
94	0	0.38159	-11.4794	1	1	17	0		99.646	H
97	0	0.38833	-11.4662	1	1	6	0		76.263	H
111	0	0.388516	-12.0763	2		6	13	19	13.2	CsLK
98	0	0.394307	-11.4589	1	1	5	0		71.528	L
112	0	0.396356	-12.0717	2		9	16	25	24.979	CL
37	0	0.401079	-11.4184	1	1	6	0		10.275	L
68	0	0.402497	-11.4319	1	1	2	0		3.959	H
38	0	0.40742	-11.4112	2		5	5	10	6.94	LK
46	0	0.414786	-11.4029	1	1	48	0		123.589	H
116	0	0.424807	-11.4481	1	0	0	101		22.358	Q
70	0	0.429829	-11.4075	1	1	8	0		14.44	H
75	0	0.452948	-11.3821	1	1	3	0		6.095	H
84	0	0.454778	-11.3813	1	1	5	0		9.944	H
39	0	0.456412	-11.3768	2		22	13	35	59.67	LK
124	0	0.461816	-12.0027	1	1	9	0		12.288	L
109	0	0.468496	-11.3835	1	1	4	0		67.071	H
128	0	0.468666	-11.9964	1	1	8	0		14.364	L
110	0	0.477427	-11.3768	1	1	7	0		75.1	H
24	0	0.477737	-11.3591	1	1	6	0		12.756	H
51	0	0.483748	-11.3035	1	1	5	0		14.068	H
113	0	0.490849	-11.3614	1	1	4	0		67.973	H
77	0	0.496112	-11.3666	1	1	49	0		105.818	L
114	0	0.498318	-11.3546	1	1	5	0		70.349	H
42	0	0.500111	-11.3186	2		5	10	15	7.515	HK
115	0	0.504779	-11.35	1	1	10	0		77.07	H
94	0	0.505474	-11.3311	1	1	4	0		11.545	L
43	0	0.505624	-11.312	2		1	9	10	3.331	CsWK
52	0	0.523441	-11.2983	2		28	22	50	138.204	HK
29	0	0.533279	-11.333	1	1	43	0		118.647	H
50	0	0.539733	-11.2833	2		15	26	41	23.023	KL
32	0	0.542621	-11.299	1	1	11	0		29.763	H
54	0	0.548635	-11.237	1	1	4	0		8.158	H
34	0	0.552026	-11.2858	1	1	8	0		16.26	H
55	0	0.555704	-11.2646	2		6	5	11	12.999	HK
103	0	0.558145	-11.2789	1	1	8	0		13.501	L
124	0	0.565056	-11.287	1	1	5	0		67.365	W
105	0	0.566672	-11.27	1	1	7	0		12.024	H
57	0	0.568747	-11.2148	1	1	1	0		0.589	H
110	0	0.602616	-11.2349	1	1	5	0		15.02	H
111	0	0.606312	-11.234	1	1	11	0		25.099	L
59	0	0.61037	-11.2105	2		10	8	18	15.233	HK
131	0	0.611543	-11.2423	1	1	8	0		73.663	H
87	0	0.614879	-11.2471	2		14	13	27	43.197	HC
149	0	0.615118	-11.8642	2		21	22	43	65.433	HC
86	0	0.622991	-11.2214	1	1	14	0		39.937	H
134	0	0.626333	-11.2268	1	1	8	0		71.196	H
136	0	0.627874	-11.2228	1	1	2	0		62.486	H
60	0	0.631696	-11.2021	1	1	27	0		61.751	L
62	0	0.649811	-11.1361	1	1	5	0		9.355	H
63	0	0.657282	-11.1298	1	1	8	0		13.347	H
42	0	0.666587	-11.1734	1	1	12	0		23.833	L
61	0	0.667974	-11.152	2		8	10	18	12.08	LK
43	0	0.671634	-11.1651	1	1	7	0		12.245	L
63	0	0.691307	-11.1336	2		13	12	25	29.54	LK
88	0	0.700761	-11.1398	1	1	11	0		25.88	H
90	0	0.705984	-11.1306	1	1	4	0		11.859	H
172	0	0.707105	-11.7581	1	1	7	0		14.794	W
121	0	0.714482	-11.124	1	1	9	0		18.487	W
64	0	0.719186	-11.0982	2		2	1	3	2.699	LK
174	0	0.722443	-11.7526	1	1	19	0		50.233	W
91	0	0.726344	-11.1276	1	1	26	0		74.268	H
92	0	0.735724	-11.1041	1	1	8	0		23.309	H
71	0	0.736886	-11.0502	2		6	6	12	13.415	LK
94	0	0.742106	-11.0958	1	1	6	0		16.608	H
123	0	0.756385	-11.08	1	1	6	0		10.993	L
59	0	0.768385	-11.0675	1	1	6	0		9.318	H
63	0	0.790354	-11.0437	1	0	0	12		2.581	Q
96	0	0.799142	-11.053	1	1	4	0		7.772	H
69	0	0.804503	-11.0378	1	1	20	0		32.141	H
128	0	0.812171	-11.0262	1	1	8	0		18.013	H
67	0	0.81972	-10.9992	2		5	6	11	8.015	LK
130	0	0.8225	-11.0139	1	1	4	0		10.975	H
68	0	0.836929	-10.9891	2		15	15	30	33.672	LK
71	0	0.86771	-10.9513	2		4	11	15	8.501	CsLK
78	0	0.879891	-10.9569	1	1	6	0		12.411	H
79	0	0.881852	-10.9531	1	1	3	0		5.755	H
190	0	0.884822	-11.5779	2		4	14	18	5.821	CL
81	0	0.885664	-10.9485	1	1	2	0		3.131	H
84	0	0.894286	-10.9401	1	1	2	0		3.757	H
75	0	0.915301	-10.9057	1	1	8	0		15.579	H
78	0	0.916557	-10.8678	1	1	2	0		3.536	H
76	0	0.922542	-10.8975	1	1	7	0		12.251	H
137	0	0.927026	-10.9069	1	1	2	0		2.265	L
80	0	0.947347	-10.8368	1	1	2	0		2.891	H
81	0	0.952191	-10.833	1	1	3	0		6.794	H
141	0	0.958309	-10.8799	1	1	11	0		17.469	H
142	0	0.961529	-10.8734	1	1	4	0		5.672	H
143	0	0.962841	-10.8706	1	1	1	0		0.534	H
82	0	0.971509	-10.8162	1	1	6	0		15.597	H
112	0	0.985388	-10.8503	1	1	6	0		8.563	H
114	0	0.990904	-10.845	1	1	5	0		9.151	L
144	0	0.994672	-10.8434	1	1	11	0		17.072	L
100	0	0.995441	-10.8396	1	1	3	0		6.077	H
145	0	1.01369	-10.8233	1	1	6	0		13.295	H
81	0	1.01689	-10.8012	1	1	3	0		5.23	H
195	0	1.01775	-11.4455	2		5	1	6	7.689	HK
118	0	1.04885	-10.7679	1	0	0	1		0.17	Q
119	0	1.05081	-10.7673	1	0	0	16		5.331	Q
150	0	1.0538	-10.7828	1	1	6	0		11.748	H
87	0	1.05411	-10.7307	1	1	4	0		5.138	H
104	0	1.06485	-10.772	1	1	5	0		12.522	H
83	0	1.06807	-10.7537	1	1	9	0		18.459	H
84	0	1.07998	-10.7376	1	1	2	0		3.13	H
88	0	1.08082	-10.7109	2		13	13	26	30.177	HK
154	0	1.10063	-10.741	1	1	14	0		29.717	L
107	0	1.11084	-10.7241	1	1	4	0		5.708	H
89	0	1.11218	-10.679	2		15	15	30	28.167	LK
108	0	1.11418	-10.7216	1	1	5	0		8.692	H
122	0	1.11562	-10.7202	1	1	5	0		9.115	H
182	0	1.12629	-10.7472	1	1	37	0		144.594	W
124	0	1.13106	-10.7051	1	1	7	0		10.035	H
114	0	1.13595	-10.7044	1	1	11	0		25.135	W
125	0	1.13661	-10.6981	1	1	3	0		4.88	H
118	0	1.14362	-10.6928	1	1	5	0		11.251	H
209	0	1.15034	-11.3111	1	1	2	0		1.111	W
157	0	1.16299	-10.6742	1	1	6	0		13.806	H
85	0	1.16594	-10.6574	2		10	6	16	24.168	LK
87	0	1.17149	-10.6498	2		5	7	12	16.655	LK
89	0	1.1823	-10.6396	2		12	8	20	18.709	HK
160	0	1.1894	-10.6457	1	1	4	0		6.518	H
93	0	1.19109	-10.5979	2		10	10	20	20.265	LK
94	0	1.20605	-10.587	2		12	12	24	34.955	HK
126	0	1.20905	-10.6276	1	1	8	0		12.043	H
162	0	1.20958	-10.628	1	1	9	0		15.449	H
96	0	1.21176	-10.5743	1	1	4	0		9.778	H
92	0	1.21784	-10.6049	1	1	10	0		21.93	H
219	0	1.21845	-11.2562	2		24	24	48	48.581	HC
93	0	1.22802	-10.5888	1	1	1	0		0.571	H
128	0	1.23037	-10.6075	1	1	11	0		16.407	H
130	0	1.23296	-10.6035	1	1	8	0		11.361	H
97	0	1.2363	-10.552	1	1	12	0		17.922	H
131	0	1.23879	-10.6005	1	1	13	0		21.54	H
98	0	1.24505	-10.546	1	1	10	0		27.927	H
165	0	1.24876	-10.589	1	1	10	0		16.113	H
133	0	1.25166	-10.5823	1	1	2	0		2.155	H
135	0	1.25234	-10.5833	1	1	4	0		8.452	H
132	0	1.26141	-10.5887	1	1	14	0		60.401	L
139	0	1.26929	-10.573	1	1	11	0		32.145	H
100	0	1.2724	-10.5122	1	1	2	0		4.475	H
101	0	1.28271	-10.505	1	1	8	0		15.818	L
102	0	1.28319	-10.5024	1	1	4	0		7.973	H
145	0	1.28572	-10.5553	1	1	11	0		27.753	H
148	0	1.29487	-10.5435	1	1	11	0		17.977	H
151	0	1.29739	-10.5368	1	1	2	0		3.02	L
104	0	1.30348	-10.4861	1	1	12	0		22.429	L
231	0	1.31979	-11.146	2		10	15	25	16.789	CL
156	0	1.32747	-10.5068	1	1	2	0		3.222	H
135	0	1.33731	-10.4802	1	0	0	9		2.921	Q
158	0	1.33956	-10.4946	1	1	2	0		3.149	H
160	0	1.34504	-10.4914	1	1	5	0		11.325	H
170	0	1.34966	-10.494	1	1	16	0		37.178	L
139	0	1.37489	-10.4599	1	1	4	0		5.359	H
107	0	1.37969	-10.4124	1	1	14	0		31.595	H
98	0	1.39501	-10.4246	1	1	5	0		10.672	W
221	0	1.40968	-10.442	1	1	5	0		66.113	L
165	0	1.41555	-10.4185	1	1	2	0		2.431	H
224	0	1.43008	-10.4203	1	1	2	0		61.399	W
101	0	1.43659	-10.3832	1	1	6	0		11.325	W
100	0	1.43738	-10.384	1	1	10	0		16.876	H
176	0	1.44233	-10.3947	1	1	8	0		13.166	H
179	0	1.47622	-10.3629	1	1	12	0		20.955	H
147	0	1.48813	-10.365	1	1	6	0		11.101	L
105	0	1.49249	-10.327	1	1	6	0		10.01	L
118	0	1.52462	-10.3088	1	1	22	0		60.198	H
184	0	1.5379	-10.2993	1	1	6	0		13.857	W
114	0	1.57314	-10.2115	1	1	4	0		4.659	L
121	0	1.57656	-10.2425	1	1	6	0		8.629	W
189	0	1.58173	-10.2545	1	1	11	0		10.496	W
147	0	1.58436	-10.2523	1	1	8	0		11.822	L
115	0	1.60054	-10.21	1	1	31	0		98.108	H
161	0	1.61129	-10.2411	1	1	5	0		8.535	H
188	0	1.6179	-10.2206	1	1	9	0		18.525	H
117	0	1.6365	-10.1542	2		12	12	24	26.437	LK
193	0	1.6436	-10.2163	2		45	34	79	95.541	LK
194	0	1.659	-10.1884	2		23	6	29	50.662	LK
125	0	1.67826	-10.1386	1	0	0	5		0.821	Q
192	0	1.67899	-10.1589	1	1	9	0		16.425	H
126	0	1.67908	-10.1377	1	0	0	2		0.547	Q
151	0	1.68015	-10.1582	1	1	10	0		18.09	W
127	0	1.68314	-10.1376	1	1	6	0		14.5	H
128	0	1.68499	-10.1318	1	0	0	2		0.52	Q
122	0	1.68768	-10.1009	1	1	12	0		18.941	L
123	0	1.6915	-10.0961	1	1	7	0		15.255	W
152	0	1.69345	-10.1472	1	1	15	0		26.271	H
129	0	1.69736	-10.1227	1	1	7	0		12.338	H
154	0	1.70536	-10.1311	1	1	4	0		11.233	H
196	0	1.70903	-10.1319	1	1	11	0		27.329	L
126	0	1.71025	-10.0749	1	1	3	0		6.574	L
197	0	1.71256	-10.1228	1	1	5	0		7.348	H
270	0	1.71369	-10.7527	2		9	8	17	18.982	HC
125	0	1.7141	-10.0762	1	1	15	0		25.062	H
130	0	1.72569	-10.0954	1	1	7	0		15.818	H
131	0	1.73057	-10.0873	1	1	3	0		4.235	H
199	0	1.73478	-10.0999	1	1	3	0		4.733	H
198	0	1.74252	-10.0948	1	1	11	0		14.4	L
133	0	1.74881	-10.0737	2		14	14	28	21.003	HK
136	0	1.8202	-10.0147	1	1	27	0		65.772	L
209	0	1.82114	-10.0157	1	1	8	0		12.595	H
130	0	1.82849	-9.95757	1	1	4	0		9.797	H
140	0	1.85693	-9.97013	2		13	4	17	37.4	HK
208	0	1.88729	-9.95126	1	1	10	0		18.793	L
142	0	1.89162	-9.93076	1	1	10	0		20.571	H
133	0	1.89182	-9.8959	1	1	6	0		15.814	H
144	0	1.9017	-9.923	1	1	10	0		28.909	H
134	0	1.9046	-9.87959	1	1	4	0		3.076	W
211	0	1.91326	-9.92019	1	1	1	0		0.423	H
135	0	1.91615	-9.877	1	1	14	0		35.313	H
145	0	1.93148	-9.88889	2		7	7	14	13.335	HK
146	0	1.93685	-9.8819	1	1	3	0		7.513	H
147	0	1.94794	-9.87743	1	1	9	0		31.331	H
189	0	1.94812	-9.89072	1	1	12	0		19.829	L
149	0	1.95343	-9.86445	1	1	2	0		4.382	H
150	0	1.9639	-9.85973	1	1	7	0		25.093	H
151	0	1.96915	-9.84774	1	1	1	0		0.81	H
142	0	1.98135	-9.81403	2		20	20	40	43.364	LK
218	0	2.01624	-9.81722	1	1	1	0		0.442	H
194	0	2.0206	-9.8196	1	1	11	0		24.718	L
155	0	2.02284	-9.82139	1	1	38	0		99.203	L
226	0	2.02616	-9.80923	1	1	5	0		7.421	H
228	0	2.03296	-9.80258	1	1	5	0		7.955	L
156	0	2.03475	-9.78928	2		12	5	17	26.523	HK
157	0	2.04497	-9.77549	1	1	5	0		13.664	H
195	0	2.04912	-9.81292	1	1	42	0		103.356	L
297	0	2.06335	-10.399	1	1	3	0		4.413	H
296	0	2.06469	-10.3991	2		6	6	12	9.67	HC
158	0	2.06646	-9.7548	2		7	13	20	16.556	CsHK
298	0	2.06862	-10.3932	1	1	2	0		2.719	H
159	0	2.06895	-9.74868	2		2	1	3	3.466	HK
147	0	2.08191	-9.70579	2		10	10	20	15.731	LK
231	0	2.09115	-9.7455	1	1	4	0		11.933	H
151	0	2.10607	-9.67832	1	1	3	0		3.812	H
200	0	2.12495	-9.71778	1	1	13	0		33.817	H
202	0	2.13336	-9.70655	1	1	9	0		23.671	H
154	0	2.14854	-9.63976	1	1	8	0		17.862	L
155	0	2.15427	-9.63311	1	1	8	0		14.547	L
162	0	2.16163	-9.66291	2		16	24	40	28.317	KL
236	0	2.16753	-9.66865	1	0	0	43		10.258	Q
240	0	2.19719	-9.63825	1	1	4	0		7.587	W
242	0	2.20111	-9.63362	1	1	3	0		5.009	W
243	0	2.20613	-9.62731	1	1	1	0		0.386	W
169	0	2.21037	-9.60826	1	1	5	0		7.089	H
244	0	2.21725	-9.62285	1	1	11	0		24.359	W
170	0	2.2205	-9.60327	1	1	11	0		25.561	H
174	0	2.24321	-9.57371	1	0	0	4		0.902	Cs
205	0	2.24551	-9.60177	1	1	21	0		50.2	H
178	0	2.26099	-9.56002	1	1	10	0		15.652	L
206	0	2.265	-9.57511	1	1	21	0		24.398	W
225	0	2.2694	-9.56916	1	1	12	0		18.825	H
226	0	2.2707	-9.56281	1	1	1	0		0.608	H
207	0	2.27745	-9.56461	1	1	20	0		31.438	L
313	0	2.28837	-10.1876	1	1	18	0		53.637	H
312	0	2.28837	-10.1877	1	1	19	0		53.994	H
180	0	2.3082	-9.51663	2		12	9	21	29.391	LK
210	0	2.31476	-9.51996	1	1	3	0		4.99	H
181	0	2.32513	-9.49872	1	1	9	0		25.891	H
211	0	2.32615	-9.51119	1	1	5	0		14.436	H
162	0	2.3381	-9.45801	2		28	28	56	45.998	HK
334	0	2.3394	-10.1295	1	1	18	0		28.104	H
164	0	2.36035	-9.42924	2		10	10	20	22.548	HK
167	0	2.40294	-9.39756	1	1	19	0		61.772	H
263	0	2.40837	-9.42659	1	1	3	0		5.856	H
182	0	2.41061	-9.4136	1	1	12	0		27.145	H
232	0	2.42347	-9.41775	1	1	20	0		28.405	H
168	0	2.42502	-9.37846	1	1	36	0		72.54	H
264	0	2.42696	-9.40923	1	1	7	0		10.294	H
234	0	2.43876	-9.40649	1	1	18	0		42.886	H
267	0	2.45034	-9.38313	1	1	1	0		0.497	H
269	0	2.45852	-9.37771	1	1	5	0		10.441	H
171	0	2.4752	-9.31077	1	1	6	0		9.483	L
172	0	2.48187	-9.3047	1	1	7	0		11.638	L
185	0	2.49863	-9.32176	1	1	8	0		13.387	L
174	0	2.50431	-9.27935	1	0	0	4		1.178	Cs
220	0	2.52316	-9.33837	1	0	0	151		41.52	Q
222	0	2.52467	-9.32605	1	0	0	8		2.593	Q
186	0	2.53388	-9.28547	2		4	8	12	9.679	KL
228	0	2.5354	-9.31088	1	1	18	0		46.614	H
187	0	2.55886	-9.28004	1	1	29	0		80.031	H
225	0	2.56721	-9.28437	1	1	3	0		5.677	H
189	0	2.57784	-9.24762	2		12	5	17	31.66	LK
190	0	2.59171	-9.22747	1	1	5	0		9.079	H
376	0	2.63118	-9.83309	1	1	8	0		11.353	H
366	0	2.6704	-9.16938	1	0	0	126		23.19	Q
287	0	2.67433	-9.1616	1	1	5	0		9.336	W
185	0	2.67703	-9.11502	1	1	16	0		31.366	H
186	0	2.68299	-9.10411	1	1	5	0		13.534	H
368	0	2.70218	-9.16258	1	0	0	555		113.14	Q
192	0	2.73195	-9.08771	2		5	4	9	10.762	LK
384	0	2.73752	-9.72498	1	1	4	0		4.99	H
192	0	2.74961	-9.03691	2		6	4	10	11.48	LK
387	0	2.75585	-9.11683	1	0	0	83		21.657	Q
389	0	2.76045	-9.1088	1	0	0	35		9.284	Q
391	0	2.76451	-9.10548	1	0	0	30		11.972	Q
193	0	2.76845	-9.05338	1	1	10	0		18.572	H
194	0	2.77416	-9.04707	2		8	8	16	16.434	HK
194	0	2.79805	-8.99304	2		14	13	27	27.946	HK
273	0	2.82155	-9.05662	1	1	66	0		161.429	H
293	0	2.82537	-9.00811	1	1	1	0		0.553	H
294	0	2.83196	-9.00413	1	1	5	0		9.925	W
233	0	2.85584	-8.9981	1	1	7	0		14.174	H
275	0	2.85921	-8.98109	1	1	11	0		25.06	H
196	0	2.85984	-8.93169	2		12	11	23	29.483	LK
196	0	2.91255	-8.91121	1	1	17	0		25.543	W
301	0	2.9201	-8.91642	1	1	8	0		11.504	H
198	0	2.94287	-8.88148	1	1	12	0		27.655	L
199	0	2.9504	-8.86703	1	1	2	0		2.743	L
200	0	2.96338	-8.8616	2		13	7	20	29.91	WK
284	0	2.98042	-8.85364	1	0	0	3		2.596	K
310	0	2.98301	-8.85697	1	1	10	0		23.955	H
240	0	2.98441	-8.88152	1	1	27	0		57.342	W
283	0	2.98608	-8.85365	1	0	0	29		23.02	K
289	0	2.98965	-8.84544	1	0	0	11		6.334	K
290	0	2.99181	-8.84299	1	0	0	7		5.284	K
291	0	2.99507	-8.84035	1	0	0	5		7.532	K
244	0	2.99519	-8.86421	1	1	15	0		33.846	W
204	0	2.99551	-8.79711	2		19	8	27	33.415	WK
206	0	3.00373	-8.784	2		8	8	16	15.832	WK
397	0	3.01767	-8.81961	1	0	0	58		14.22	Q
201	0	3.03569	-8.7846	2		5	4	9	13.037	HK
202	0	3.04259	-8.77427	1	1	1	0		0.682	H
207	0	3.07737	-8.70896	1	1	5	0		10.809	H
203	0	3.11692	-8.70066	1	1	3	0		3.296	L
293	0	3.13186	-8.73684	1	1	48	0		127.305	W
317	0	3.15788	-8.6788	1	1	8	0		12.043	H
296	0	3.15948	-8.6819	1	1	12	0		28.97	L
209	0	3.16078	-8.62467	1	1	6	0		7.624	L
210	0	3.17581	-8.61913	1	1	9	0		41.774	L
298	0	3.1879	-8.66317	2		23	23	46	63.848	LK
205	0	3.19398	-8.62492	1	1	3	0		8.029	H
299	0	3.19605	-8.63919	1	1	5	0		6.851	L
212	0	3.21931	-8.566	2		3	3	6	7.122	LK
302	0	3.24121	-8.59386	1	1	5	0		6.261	H
416	0	3.24662	-9.22505	2		25	26	51	38.008	LC
324	0	3.2627	-8.57162	1	1	3	0		3.554	L
325	0	3.26591	-8.5697	1	1	6	0		8.171	L
423	0	3.27299	-8.57984	1	1	5	0		70.183	L
426	0	3.29531	-8.5593	1	1	8	0		76.622	H
427	0	3.29663	-8.54648	1	0	0	217		35.198	Q
429	0	3.29987	-8.53458	1	0	0	25		4.028	Q
208	0	3.30283	-8.52413	2		12	12	24	37.03	HK
305	0	3.32037	-8.51453	1	1	4	0		5.616	H
209	0	3.32708	-8.49176	1	1	3	0		7.818	L
335	0	3.34912	-8.48486	1	1	2	0		2.32	L
343	0	3.39599	-8.43746	1	1	1	0		0.442	L
217	0	3.4003	-8.3885	2		8	8	16	19.688	LK
256	0	3.40752	-8.42771	1	1	4	0		6.832	W
211	0	3.40991	-8.41014	1	1	6	0		12.192	H
253	0	3.41768	-8.4334	1	1	2	0		3.874	H
344	0	3.42095	-8.41488	1	1	5	0		9.004	H
312	0	3.44711	-8.38882	1	1	5	0		9.318	H
347	0	3.45161	-8.38457	1	1	5	0		10.238	W
350	0	3.48291	-8.35535	1	1	10	0		17.715	H
352	0	3.49256	-8.34186	1	1	2	0		3.885	H
446	0	3.51079	-8.34512	1	1	10	0		81.277	H
449	0	3.5191	-8.33106	1	1	1	0		60.589	H
451	0	3.52248	-8.3301	1	1	7	0		69.299	H
357	0	3.53338	-8.30561	1	1	10	0		20.374	L
358	0	3.54628	-8.29171	1	1	10	0		16.775	L
359	0	3.56168	-8.28569	1	1	24	0		50.532	L
226	0	3.61269	-8.17268	1	1	5	0		7.329	L
446	0	3.63915	-8.22934	1	0	0	65		6.537	Q
213	0	3.64172	-8.17819	1	1	6	0		11.675	H
366	0	3.64179	-8.19682	1	1	12	0		18.996	H
321	0	3.65594	-8.18213	1	1	7	0		17.026	L
265	0	3.66132	-8.18977	1	1	3	0		3.93	H
371	0	3.66714	-8.16742	1	1	2	0		4.438	H
372	0	3.67109	-8.16418	1	1	3	0		6.979	H
377	0	3.70253	-8.1343	1	1	8	0		12.595	H
326	0	3.74006	-8.09399	1	1	2	0		2.597	H
458	0	3.74581	-8.12232	1	0	0	37		5.242	Q
462	0	3.75326	-8.11527	1	0	0	24		6.699	Q
385	0	3.75813	-8.08057	1	1	10	0		19.316	L
231	0	3.76173	-8.02175	1	1	1	0		0.534	H
386	0	3.76731	-8.06854	1	1	3	0		9.06	H
478	0	3.77352	-8.69061	1	1	5	0		10.853	H
389	0	3.77403	-8.05947	1	1	1	0		0.571	H
388	0	3.77898	-8.06037	1	1	12	0		21.651	L
480	0	3.78301	-8.68695	1	1	13	0		31.842	H
270	0	3.78362	-8.07186	1	1	8	0		19.742	W
482	0	3.79758	-8.67493	1	1	15	0		41.038	H
271	0	3.8	-8.05799	2		15	8	23	28.77	LC
329	0	3.81237	-8.02364	1	1	5	0		9.631	L
330	0	3.81469	-8.02031	1	1	4	0		6.003	H
481	0	3.85815	-7.99453	1	1	5	0		69.649	H
232	0	3.86417	-7.9193	1	1	1	0		0.497	H
399	0	3.87059	-7.96486	1	1	5	0		7.623	H
333	0	3.89002	-7.9449	1	1	4	0		5.726	H
486	0	3.89626	-8.57028	2		10	9	19	19.569	LC
334	0	3.89686	-7.94267	1	1	14	0		22.315	L
402	0	3.89979	-7.93457	1	1	3	0		3.683	H
409	0	3.93095	-7.90863	1	0	0	29		22.476	Q
217	0	3.9325	-7.88749	1	1	6	0		11.97	H
410	0	3.9341	-7.90181	1	0	0	23		9.299	Q
237	0	3.94726	-7.83756	1	1	4	0		5.34	L
272	0	3.95635	-7.88473	1	1	14	0		27.878	L
489	0	3.96512	-8.49967	2		7	7	14	13.25	HC
239	0	3.96758	-7.8193	1	1	6	0		12.761	H
273	0	3.98078	-7.85966	1	1	11	0		25.606	L
414	0	3.98778	-7.84664	1	1	3	0		3.886	H
340	0	4.03581	-7.80084	1	1	5	0		11.951	H
244	0	4.04963	-7.73508	1	1	3	0		4.972	H
344	0	4.08	-7.75489	1	1	3	0		5.635	H
218	0	4.0951	-7.72755	2		9	3	12	21.544	HK
276	0	4.09927	-7.75997	2		18	40	58	33.245	LC
277	0	4.1044	-7.74967	2		7	6	13	14.652	HC
278	0	4.11107	-7.74418	1	1	7	0		18.899	H
280	0	4.11312	-7.73705	1	1	1	0		0.615	H
219	0	4.12303	-7.69924	1	1	9	0		20.152	W
348	0	4.12859	-7.70566	1	1	2	0		3.314	H
423	0	4.1337	-7.7056	1	1	14	0		21.489	H
424	0	4.14542	-7.69793	1	1	15	0		36.076	H
349	0	4.15621	-7.67727	1	1	1	0		0.497	L
495	0	4.18699	-8.27667	1	1	5	0		9.174	H
220	0	4.1935	-7.63094	1	1	12	0		27.99	L
249	0	4.19669	-7.59043	2		9	8	17	13.612	HK
497	0	4.21411	-8.24998	1	1	8	0		10.706	H
430	0	4.23285	-7.61037	1	1	16	0		35.598	W
222	0	4.24528	-7.58696	1	1	23	0		56.081	H
432	0	4.25901	-7.5849	1	1	21	0		38.078	L
501	0	4.28241	-8.18028	1	1	3	0		5.681	W
255	0	4.30351	-7.48182	1	1	4	0		7.2	H
518	0	4.30457	-7.55474	1	1	17	0		93.492	L
256	0	4.31279	-7.47261	1	1	5	0		7.421	H
505	0	4.31587	-8.16388	1	1	40	0		67.105	L
257	0	4.33073	-7.46446	1	1	17	0		42.685	H
223	0	4.34818	-7.47258	2		10	10	20	14.729	LK
260	0	4.37562	-7.40906	1	1	3	0		4.843	H
277	0	4.37839	-7.45809	1	1	3	0		11.343	H
261	0	4.38145	-7.40274	1	1	2	0		3.094	H
449	0	4.40692	-7.42657	1	1	1	0		0.589	H
514	0	4.41436	-8.04972	1	1	6	0		10.689	H
364	0	4.47438	-7.35914	1	1	1	0		0.681	H
265	0	4.48555	-7.30877	1	1	19	0		39.543	H
520	0	4.48776	-7.97426	1	1	2	0		3.273	H
225	0	4.48832	-7.33168	2		5	4	9	12.022	HK
523	0	4.50543	-7.36429	1	0	0	40		11.003	Q
525	0	4.50634	-7.36059	1	0	0	2		0.954	Q
542	0	4.52487	-7.31458	1	0	0	109		22.028	Q
268	0	4.5327	-7.25286	1	1	4	0		8.01	H
269	0	4.53754	-7.24677	1	1	2	0		3.517	H
270	0	4.54197	-7.24151	1	1	1	0		0.515	H
227	0	4.55413	-7.26467	2		5	5	10	7.663	LK
455	0	4.55952	-7.27836	1	1	11	0		16.352	H
545	0	4.56715	-7.29866	2		24	20	44	116.919	HK
271	0	4.57466	-7.21411	2		12	12	24	19.547	LK
458	0	4.58583	-7.24765	1	1	1	0		0.552	H
272	0	4.59706	-7.18913	2		5	5	10	10.281	HK
273	0	4.59825	-7.18885	1	1	9	0		13.553	H
530	0	4.6003	-7.87627	1	1	26	0		55.638	W
531	0	4.60999	-7.85972	1	1	14	0		30.958	W
380	0	4.61083	-7.22567	1	1	7	0		11.399	H
283	0	4.63059	-7.21194	1	1	20	0		33.104	H
383	0	4.66247	-7.17121	1	0	0	5		1.252	Cs
277	0	4.66609	-7.12475	2		13	13	26	26.995	LK
389	0	4.73781	-7.09564	1	1	1	0		0.405	W
279	0	4.74327	-7.04598	2		11	11	22	21.309	HK
391	0	4.77511	-7.0624	1	1	12	0		15.044	W
392	0	4.77648	-7.05739	1	1	2	0		1.952	W
393	0	4.77935	-7.055	1	1	4	0		3.694	W
283	0	4.7887	-6.99603	1	1	3	0		5.027	H
282	0	4.79027	-6.99929	1	1	14	0		22.39	L
395	0	4.80216	-7.043	2		14	9	23	42.574	LK
541	0	4.80644	-7.65799	2		6	6	12	11.968	CsHK
396	0	4.81368	-7.01979	1	1	1	0		0.497	W
545	0	4.83016	-7.63247	1	1	4	0		5.485	H
583	0	4.83094	-7.02111	1	1	4	0		67.365	H
584	0	4.83367	-7.01729	1	1	2	0		63.462	H
547	0	4.83889	-7.62666	1	1	11	0		15.99	H
548	0	4.84273	-7.62076	1	1	6	0		8.569	H
399	0	4.8532	-6.9812	1	1	5	0		3.848	W
472	0	4.86173	-6.97556	1	1	6	0		14.234	H
289	0	4.91772	-6.86658	2		4	4	8	3.484	WK
238	0	4.92212	-6.89952	2		9	8	17	17.901	LK
554	0	4.92531	-6.94826	1	0	0	124		24.861	Q
290	0	4.92663	-6.86152	2		11	6	17	17.326	HK
291	0	4.93814	-6.85533	2		12	5	17	36.499	HK
403	0	4.94349	-6.89148	1	1	3	0		5.892	W
478	0	5.00441	-6.83231	1	1	8	0		12.191	L
563	0	5.01336	-7.44859	1	0	0	3		3	C
292	0	5.01685	-6.77578	2		14	11	25	33.454	WK
240	0	5.02288	-6.79395	1	1	1	0		0.571	L
482	0	5.04823	-6.79157	1	1	9	0		23.273	L
485	0	5.08926	-6.74422	1	1	1	0		0.534	H
487	0	5.0915	-6.74199	1	1	1	0		0.553	H
490	0	5.10206	-6.73498	1	1	8	0		13.35	H
572	0	5.11096	-7.3535	1	1	6	0		12.057	H
410	0	5.12044	-6.71301	1	1	1	0		0.442	W
573	0	5.13846	-7.32708	1	1	7	0		15.971	H
295	0	5.15183	-6.63488	1	1	6	0		12.154	H
415	0	5.16042	-6.67306	1	1	1	0		0.516	H
495	0	5.16208	-6.6736	1	1	13	0		8.47	H
416	0	5.1642	-6.6706	1	1	2	0		5.285	H
496	0	5.16626	-6.66907	1	1	5	0		7.182	H
296	0	5.18029	-6.61149	1	1	13	0		30.418	L
499	0	5.1911	-6.64419	1	1	5	0		7.071	H
298	0	5.19427	-6.59038	1	1	3	0		4.733	L
242	0	5.19437	-6.62269	1	0	0	6		1.436	Cs
503	0	5.23872	-6.59515	1	1	2	0		1.934	H
578	0	5.25747	-7.20726	1	1	7	0		13.057	L
303	0	5.2597	-6.52705	1	1	6	0		12.282	L
579	0	5.26167	-7.20245	1	1	5	0		10.809	L
251	0	5.27382	-6.54343	1	1	2	0		2.099	L
307	0	5.33225	-6.4582	1	1	14	0		25.616	H
308	0	5.36382	-6.42829	1	1	14	0		31.596	L
422	0	5.36401	-6.47288	1	1	6	0		12.798	H
296	0	5.36505	-6.47358	1	1	8	0		19.057	H
583	0	5.36678	-7.09793	1	1	8	0		12.99	H
297	0	5.38252	-6.45475	1	1	7	0		14.152	H
311	0	5.41067	-6.37822	2		9	6	15	20.006	LK
312	0	5.42181	-6.36531	1	1	7	0		13.645	L
300	0	5.42234	-6.42549	1	1	16	0		52.208	H
301	0	5.42656	-6.41008	1	1	8	0		11.878	H
511	0	5.43082	-6.40734	1	1	8	0		17.388	W
302	0	5.45049	-6.40401	1	1	27	0		76.192	H
303	0	5.4585	-6.38016	1	1	7	0		19.201	H
305	0	5.47158	-6.36561	1	1	5	0		13.884	H
430	0	5.47301	-6.36321	1	1	6	0		10.385	H
513	0	5.47551	-6.36276	1	1	9	0		17.753	L
316	0	5.4863	-6.30389	2		10	2	12	24.697	LK
318	0	5.48868	-6.29577	2		2	2	4	4.001	LK
594	0	5.50257	-6.96091	1	1	6	0		8.529	H
320	0	5.53773	-6.28394	1	1	51	0		138.023	H
322	0	5.55143	-6.24017	1	1	14	0		29.76	H
519	0	5.55759	-6.27589	1	1	1	0		0.534	W
520	0	5.55953	-6.27397	1	1	1	0		0.589	W
521	0	5.56472	-6.27336	1	1	11	0		17.106	H
522	0	5.56617	-6.26732	1	1	1	0		0.571	H
600	0	5.56773	-6.89484	1	1	3	0		5.243	H
525	0	5.58194	-6.25199	1	1	2	0		2.136	H
528	0	5.59715	-6.24048	1	1	6	0		15.482	L
256	0	5.59802	-6.22171	1	1	5	0		11.04	H
529	0	5.60084	-6.23415	1	1	3	0		5.967	L
531	0	5.61764	-6.21963	1	1	5	0		14.197	H
258	0	5.65366	-6.16862	2		11	13	24	20.178	KW
535	0	5.67169	-6.16588	1	1	9	0		15.256	W
437	0	5.69194	-6.14597	1	1	11	0		16.48	H
438	0	5.6943	-6.14005	1	1	3	0		3.665	H
439	0	5.69745	-6.13604	1	1	1	0		0.589	H
259	0	5.70092	-6.11879	1	1	6	0		10.957	H
538	0	5.73121	-6.10293	1	1	2	0		2.909	H
539	0	5.7328	-6.10144	1	1	2	0		3.259	H
540	0	5.7337	-6.09978	1	1	1	0		0.534	H
311	0	5.75744	-6.07669	1	1	2	0		2.891	H
444	0	5.76157	-6.07484	1	1	4	0		11.067	H
329	0	5.76681	-6.0308	1	1	20	0		51.413	H
262	0	5.822	-5.99607	1	1	3	0		5.064	L
263	0	5.83985	-5.97864	1	1	3	0		6.574	L
641	0	5.8717	-6.61861	1	1	51	0		105.128	H
450	0	5.88132	-5.95617	2		9	12	21	14.99	KW
318	0	5.90849	-5.9435	1	1	4	0		7.136	H
645	0	5.95535	-6.50655	1	1	4	0		2.843	W
646	0	5.96021	-6.50518	1	1	7	0		15.395	W
647	0	5.96256	-6.49998	1	1	3	0		5.114	W
648	0	5.96488	-6.49766	1	1	3	0		5.171	W
333	0	5.96558	-5.82351	2		10	10	20	20.734	LK
318	0	6.00561	-5.83532	1	1	11	0		27.326	H
651	0	6.00795	-6.45554	1	1	6	0		8.585	H
320	0	6.00952	-5.82661	1	1	4	0		10.054	H
565	0	6.01026	-5.82656	1	1	8	0		12.577	H
264	0	6.02735	-5.79251	1	1	4	0		11.472	L
652	0	6.04081	-6.42066	1	0	0	4		1.286	Cs
457	0	6.04455	-5.79509	2		10	10	20	22.687	HK
654	0	6.05881	-6.40274	1	0	0	6		1.572	Cs
265	0	6.06842	-5.75513	2		13	13	26	24.774	LK
655	0	6.06895	-6.39442	1	1	6	0		8.157	H
266	0	6.09282	-5.72784	1	1	8	0		14.382	H
571	0	6.13135	-5.70298	1	1	3	0		3.591	H
573	0	6.17969	-5.65378	1	1	1	0		0.497	H
471	0	6.18977	-5.6445	1	1	4	0		3.369	W
472	0	6.19617	-5.63981	1	1	5	0		9.502	W
476	0	6.21938	-5.61601	1	1	5	0		7.403	L
324	0	6.26333	-5.57237	1	1	3	0		8.526	H
667	0	6.27171	-6.19148	1	1	4	0		7.486	H
325	0	6.30601	-5.5305	1	1	8	0		11.454	H
580	0	6.31226	-5.52533	1	1	10	0		15.351	L
581	0	6.31834	-5.51775	1	1	7	0		9.944	H
340	0	6.32242	-5.47263	1	1	17	0		42.196	L
268	0	6.33424	-5.48584	1	1	6	0		12.283	H
343	0	6.36555	-5.41964	2		3	2	5	6.662	LK
270	0	6.39915	-5.42081	1	1	6	0		11.852	H
672	0	6.40112	-6.06348	1	1	6	0		12.571	H
584	0	6.40658	-5.43237	1	1	9	0		20.227	H
589	0	6.44403	-5.38946	1	1	1	0		0.552	H
588	0	6.44461	-5.38992	1	1	2	0		4.309	H
590	0	6.44634	-5.38715	1	1	1	0		0.534	H
329	0	6.4727	-5.3633	1	1	5	0		9.594	L
271	0	6.49442	-5.3261	1	1	6	0		13.866	H
488	0	6.49718	-5.33749	1	1	3	0		4.806	H
678	0	6.49994	-5.96152	1	0	0	5		1.243	Cs
592	0	6.50802	-5.32738	1	1	4	0		7.439	L
348	0	6.51311	-5.27691	1	1	8	0		24.069	H
492	0	6.52769	-5.30826	1	1	17	0		9.409	L
349	0	6.53017	-5.25513	1	1	5	0		7.09	L
273	0	6.53107	-5.291	1	1	9	0		19.468	H
274	0	6.53269	-5.28412	1	1	1	0		0.516	H
596	0	6.56793	-5.26575	1	0	0	5		1.234	Cs
495	0	6.57958	-5.25968	1	1	12	0		21.336	H
276	0	6.60223	-5.22059	1	1	21	0		22.153	L
599	0	6.60571	-5.23475	1	1	13	0		25.636	L
600	0	6.61462	-5.22595	1	1	12	0		26.065	H
351	0	6.61847	-5.16995	1	1	8	0		18.341	H
601	0	6.6318	-5.20358	1	1	5	0		7.347	H
334	0	6.64554	-5.18885	1	1	3	0		3.812	H
686	0	6.68103	-5.18727	1	0	0	37		5.897	Q
339	0	6.69776	-5.13987	1	1	11	0		15.452	H
691	0	6.73345	-5.72974	1	1	4	0		7.458	H
605	0	6.74867	-5.08716	1	1	6	0		8.986	W
606	0	6.75209	-5.084	1	1	6	0		9.907	W
609	0	6.77192	-5.06216	1	1	2	0		2.688	H
611	0	6.7867	-5.05005	1	1	6	0		12.283	H
700	0	6.7935	-5.66808	1	0	0	7		1.686	Cs
355	0	6.81811	-4.96771	2		4	4	8	8.922	LK
617	0	6.8289	-5.00965	1	1	8	0		18.748	H
278	0	6.87818	-4.94461	2		9	2	11	22.074	HK
516	0	6.89886	-4.91833	1	0	0	6		1.899	Q
602	0	6.91296	-4.9465	2		16	13	29	94.029	LK
624	0	6.91972	-4.91506	1	1	3	0		5.193	W
519	0	6.92738	-4.88993	1	0	0	9		2.305	Q
520	0	6.93614	-4.8809	1	0	0	4		1.34	Q
634	0	6.94943	-4.88728	1	1	6	0		12.135	W
635	0	6.95276	-4.88273	1	1	4	0		7.789	W
636	0	6.95431	-4.87991	1	1	2	0		3.186	H
637	0	6.96754	-4.87045	1	1	11	0		16.775	H
639	0	6.97518	-4.85977	1	1	3	0		5.819	W
279	0	6.98018	-4.84291	1	1	10	0		23.123	W
280	0	7.00222	-4.81455	1	0	0	2		0.396	Q
281	0	7.00337	-4.81396	1	0	0	5		2.38	Q
720	0	7.00812	-4.86265	1	0	0	89		14.78	Q
526	0	7.0118	-4.83096	1	1	14	0		33.959	L
721	0	7.01493	-4.85811	1	0	0	91		22.968	Q
528	0	7.01736	-4.82085	1	1	7	0		17.552	H
644	0	7.0183	-4.81701	1	1	5	0		7.108	H
722	0	7.01935	-4.84994	1	0	0	35		9.416	Q
646	0	7.02429	-4.81189	1	1	4	0		10.239	H
347	0	7.02542	-4.82779	1	1	5	0		11.546	H
723	0	7.02862	-4.84489	1	0	0	94		24.624	Q
725	0	7.03226	-4.83545	1	0	0	14		3.76	Q
724	0	7.03593	-5.43891	1	1	27	0		49.455	L
728	0	7.04682	-5.41737	1	1	6	0		11.085	H
729	0	7.04856	-5.41266	1	1	1	0		0.371	L
730	0	7.04996	-5.41252	1	1	6	0		4.9	W
648	0	7.06143	-4.80512	1	1	43	0		119.589	H
652	0	7.07022	-4.76462	1	1	4	0		5.451	L
552	0	7.14412	-4.69161	1	1	6	0		8.637	H
655	0	7.1476	-4.68803	1	1	4	0		8.268	H
656	0	7.14937	-4.68413	1	1	1	0		0.608	H
659	0	7.17473	-4.66155	1	1	7	0		10.607	H
738	0	7.18354	-5.28025	1	1	5	0		9.614	L
661	0	7.22602	-4.61074	1	1	9	0		12.314	H
744	0	7.24115	-5.22033	1	0	0	5		1.315	Cs
745	0	7.24199	-5.21941	1	0	0	4		1.043	Cs
286	0	7.25171	-4.56524	1	0	0	4		1.031	Cs
556	0	7.28855	-4.54636	1	1	4	0		5.671	H
749	0	7.31154	-5.15337	1	1	9	0		13.685	H
287	0	7.31564	-4.50638	1	1	9	0		19.28	L
360	0	7.31768	-4.51942	1	1	9	0		13.534	H
355	0	7.32854	-4.52236	1	1	2	0		3.26	H
758	0	7.34238	-5.1233	1	1	10	0		16.455	H
364	0	7.34887	-4.43649	1	1	4	0		7.292	H
760	0	7.35674	-5.10745	1	1	8	0		11.087	H
365	0	7.37891	-4.40753	1	1	7	0		11.195	H
363	0	7.39346	-4.44699	1	1	11	0		25.621	H
625	0	7.39917	-4.45505	1	1	7	0		75.177	H
564	0	7.39977	-4.4355	1	1	4	0		6.961	H
766	0	7.4198	-5.04522	1	1	6	0		14.061	L
565	0	7.44329	-4.40359	1	1	25	0		48.769	H
566	0	7.44813	-4.38952	1	1	8	0		15.542	L
360	0	7.47641	-4.37888	1	1	9	0		19.06	H
361	0	7.47903	-4.37193	1	1	2	0		3.444	H
366	0	7.47999	-4.35864	1	1	12	0		19.072	H
368	0	7.50755	-4.32738	1	1	4	0		5.782	H
679	0	7.5308	-4.3038	1	1	3	0		4.566	L
793	0	7.56978	-4.89375	1	1	6	0		8.72	H
290	0	7.56987	-4.24889	1	1	4	0		7.513	H
794	0	7.57091	-4.89035	1	1	1	0		0.553	H
296	0	7.59614	-4.2218	1	1	4	0		4.585	L
576	0	7.59666	-4.24012	1	1	5	0		12.416	H
297	0	7.59799	-4.2188	1	1	1	0		0.442	L
300	0	7.63916	-4.17969	1	1	6	0		7.844	H
682	0	7.65485	-4.17995	1	1	3	0		5.249	H
683	0	7.65652	-4.17693	1	1	1	0		0.441	H
301	0	7.68017	-4.14317	1	1	9	0		24.012	H
813	0	7.68276	-4.78214	1	1	7	0		13.611	H
815	0	7.68405	-4.77719	1	1	1	0		0.468	H
818	0	7.69007	-4.77405	1	1	4	0		10.818	H
302	0	7.69792	-4.12005	1	1	2	0		4.695	H
303	0	7.72909	-4.09102	1	1	6	0		12.429	H
819	0	7.73828	-4.72734	1	1	8	0		16.2	H
684	0	7.73872	-4.09668	1	1	4	0		7.439	L
820	0	7.74045	-4.12664	1	0	0	17		1.524	Q
685	0	7.74216	-4.0933	1	1	3	0		7.66	L
821	0	7.74254	-4.1259	1	0	0	25		6.382	Q
822	0	7.74394	-4.12371	1	0	0	13		3.547	Q
823	0	7.74446	-4.12241	1	0	0	2		0.726	Q
824	0	7.74522	-4.1215	1	0	0	1		0.171	Q
691	0	7.77802	-4.05544	1	1	1	0		0.46	H
692	0	7.78287	-4.05209	1	1	5	0		5.855	W
588	0	7.81191	-4.02371	1	1	4	0		8.213	H
830	0	7.84516	-4.02161	1	0	0	2		0.356	Q
831	0	7.84572	-4.02098	1	0	0	1		0.143	Q
832	0	7.84923	-4.02025	1	0	0	26		10.143	Q
833	0	7.8507	-4.01635	1	0	0	3		1.382	Q
834	0	7.85148	-4.01541	1	0	0	3		0.827	Q
699	0	7.86067	-3.97827	1	1	9	0		20.175	H
703	0	7.93013	-3.90515	1	1	5	0		6.997	L
704	0	7.94005	-3.89654	1	1	6	0		11.711	H
656	0	7.95258	-3.90084	1	1	6	0		72.301	H
841	0	7.95854	-4.50783	1	1	8	0		18.931	H
842	0	7.96069	-3.91043	1	0	0	27		16.028	Q
843	0	7.96161	-3.90559	1	0	0	5		1.909	Q
844	0	7.9628	-3.90437	1	0	0	3		1.795	Q
705	0	7.96338	-3.87037	1	0	0	17		1.518	Q
845	0	7.96339	-3.90331	1	0	0	1		0.128	Q
595	0	7.98419	-3.85241	1	1	8	0		11.748	L
382	0	8.01057	-3.82431	1	1	3	0		5.589	H
373	0	8.04632	-3.74094	1	1	7	0		14.124	W
371	0	8.06227	-3.78787	1	1	1	0		0.498	H
374	0	8.09651	-3.69158	1	1	10	0		17.126	H
375	0	8.10102	-3.68452	1	1	3	0		7.955	H
861	0	8.11815	-3.74896	1	0	0	12		1.582	Q
717	0	8.12263	-3.71299	1	1	4	0		8.25	H
666	0	8.15251	-3.70273	1	1	10	0		78.873	L
308	0	8.17253	-3.65313	1	1	14	0		32.355	H
602	0	8.18872	-3.64657	1	1	3	0		7.016	L
603	0	8.23816	-3.59964	1	1	7	0		16.057	L
719	0	8.24186	-3.59357	1	0	0	50		7.55	Q
720	0	8.24569	-3.59033	1	0	0	28		9.664	Q
721	0	8.24663	-3.58713	1	0	0	5		1.518	Q
722	0	8.24755	-3.58613	1	0	0	3		1.263	Q
723	0	8.2494	-3.58528	1	0	0	7		4.839	Q
873	0	8.25853	-4.20947	2		16	16	32	24.832	LC
724	0	8.26302	-3.57698	1	1	14	0		24.003	L
380	0	8.33701	-3.44867	1	1	5	0		8.44	H
879	0	8.35024	-3.51647	1	0	0	1		0.185	Q
880	0	8.35158	-3.5159	1	0	0	5		2.921	Q
881	0	8.35318	-3.51416	1	0	0	4		2.45	Q
381	0	8.35877	-3.42785	1	1	6	0		11.841	W
731	0	8.36529	-3.46932	1	1	3	0		4.566	H
882	0	8.37352	-3.49337	1	0	0	4		0.798	Q
883	0	8.37422	-3.49271	1	0	0	6		0.969	Q
884	0	8.3752	-3.49201	1	0	0	8		1.966	Q
885	0	8.37602	-3.49101	1	0	0	5		1.31	Q
398	0	8.37819	-3.46457	1	1	16	0		33.956	L
310	0	8.38811	-3.43072	2		5	4	9	7.772	LK
887	0	8.40102	-3.47288	1	0	0	79		26.054	Q
889	0	8.40357	-3.4651	1	0	0	16		7.194	Q
888	0	8.40498	-4.06039	1	1	7	0		15.337	L
890	0	8.40684	-3.46271	1	0	0	19		10.35	Q
385	0	8.40999	-3.37605	1	1	5	0		9.759	L
390	0	8.41219	-3.44294	1	1	9	0		18.477	H
891	0	8.42007	-3.45941	1	0	0	103		46.112	Q
387	0	8.42278	-3.36995	1	1	11	0		33.839	L
892	0	8.42877	-4.03254	1	1	1	0		0.709	H
388	0	8.45205	-3.33299	1	1	3	0		6.132	H
615	0	8.46083	-3.3775	1	1	7	0		18.002	W
896	0	8.48029	-3.99391	1	1	22	0		47.126	H
898	0	8.49152	-3.96986	1	0	0	3		0.964	Cs
899	0	8.49848	-3.96636	1	1	9	0		13.399	L
618	0	8.49891	-3.33644	1	1	7	0		7.274	W
738	0	8.5158	-3.32504	1	1	16	0		27.029	H
739	0	8.5277	-3.31011	1	1	10	0		16.113	H
624	0	8.55101	-3.28556	1	1	6	0		11.656	L
741	0	8.56796	-3.27335	1	1	17	0		28.701	L
401	0	8.57734	-3.26001	1	1	6	0		14.455	H
904	0	8.58555	-3.88484	1	1	16	0		33.413	L
633	0	8.66703	-3.17377	1	1	13	0		26.88	L
313	0	8.66954	-3.15123	2		10	10	20	14.761	HK
912	0	8.67028	-3.79552	1	1	8	0		16.874	H
635	0	8.69151	-3.15732	2		36	25	61	55.796	KH
394	0	8.69154	-3.09337	2		3	7	10	5.705	HK
637	0	8.70671	-3.141	2		28	27	55	51.747	HK
398	0	8.70964	-3.14556	1	1	7	0		18.709	H
638	0	8.71836	-3.11828	1	1	6	0		11.877	W
399	0	8.72216	-3.13144	1	1	5	0		12.982	H
395	0	8.72791	-3.06745	1	1	18	0		43.29	W
409	0	8.73167	-3.0894	1	0	0	40		15.864	Q
410	0	8.73386	-3.08399	1	0	0	11		4.265	Q
411	0	8.73735	-3.08141	1	0	0	20		7.528	Q
396	0	8.73805	-3.05112	1	1	14	0		20.993	L
412	0	8.73839	-3.07885	1	0	0	6		2.061	Q
748	0	8.74051	-3.09358	1	1	2	0		2.726	W
413	0	8.74601	-3.09215	1	1	8	0		17.355	H
397	0	8.7807	-3.00294	1	0	0	5		1.105	Cs
401	0	8.81513	-2.97087	1	1	5	0		9.594	H
925	0	8.82287	-3.04491	1	0	0	11		4.017	Q
926	0	8.82354	-3.04319	1	0	0	1		0.213	Q
410	0	8.85276	-2.93324	2		7	7	14	9.573	LK
314	0	8.87487	-2.95107	1	1	11	0		33.385	H
315	0	8.87721	-2.94046	1	1	2	0		3.628	H
420	0	8.95219	-2.90316	1	1	43	0		79.228	L
758	0	8.95802	-2.87906	1	1	10	0		13.479	H
424	0	8.95846	-2.87767	1	1	7	0		10.073	H
759	0	8.96038	-2.87439	1	1	4	0		5.156	H
760	0	8.96201	-2.87221	1	1	2	0		3.204	H
937	0	8.96228	-2.91051	1	0	0	69		22.04	Q
938	0	8.96435	-2.904	1	0	0	11		6.068	Q
425	0	8.96773	-2.86895	1	1	4	0		12.043	H
410	0	9.0381	-2.81331	1	1	3	0		5.065	H
941	0	9.04306	-3.42228	1	1	7	0		15.218	H
429	0	9.04403	-2.79918	1	1	14	0		35.532	L
943	0	9.04531	-3.41601	1	1	1	0		0.762	H
411	0	9.06384	-2.78713	1	1	4	0		3.503	H
318	0	9.08166	-2.74747	2		19	10	29	44.863	LK
319	0	9.08686	-2.73191	1	1	5	0		7.583	L
321	0	9.1089	-2.71037	1	1	5	0		9.373	H
413	0	9.12315	-2.7284	1	1	3	0		5.586	H
767	0	9.13884	-2.69461	1	1	1	0		0.406	L
418	0	9.14958	-2.63957	1	1	9	0		20.935	H
433	0	9.15616	-2.68681	1	1	21	0		34.712	H
417	0	9.15757	-2.69393	2		4	3	7	5.412	HC
435	0	9.1595	-2.67481	1	1	3	0		3.517	H
419	0	9.18366	-2.60267	1	1	6	0		10.79	W
420	0	9.20181	-2.58188	1	0	0	6		1.308	Cs
964	0	9.20981	-3.25961	1	1	16	0		29.89	H
421	0	9.21523	-2.56877	1	1	2	0		2.412	W
967	0	9.22847	-2.63999	1	0	0	33		6.424	Q
422	0	9.22958	-2.56631	1	1	15	0		45.188	W
424	0	9.26264	-2.5236	2		7	6	13	10.472	HK
442	0	9.27025	-2.54736	1	0	0	9		3.421	Q
444	0	9.27126	-2.54585	1	0	0	6		1.603	Q
445	0	9.27169	-2.54501	1	0	0	1		0.129	Q
446	0	9.27279	-2.54455	1	0	0	6		2.433	Q
770	0	9.27744	-2.5596	1	1	6	0		13.35	W
974	0	9.28308	-2.58378	1	0	0	5		0.698	Q
975	0	9.28465	-2.58318	1	0	0	10		4.202	Q
654	0	9.2855	-2.558	1	1	16	0		36.596	W
976	0	9.28886	-2.58128	1	0	0	32		12.51	Q
977	0	9.28974	-2.57737	1	0	0	3		1.581	Q
978	0	9.29492	-2.57657	1	0	0	44		17.379	Q
979	0	9.29914	-2.57142	1	0	0	22		14.042	Q
452	0	9.29954	-2.53733	1	1	7	0		12.724	H
980	0	9.30185	-2.56615	1	0	0	8		4.815	Q
456	0	9.31017	-2.52471	1	1	3	0		5.554	H
324	0	9.31448	-2.5118	1	1	17	0		34.614	H
458	0	9.3182	-2.51688	1	1	3	0		6.261	H
996	0	9.32053	-2.54676	1	0	0	4		2.251	Q
326	0	9.32776	-2.49389	1	1	7	0		17.952	H
427	0	9.43694	-2.3505	1	1	9	0		14.787	L
475	0	9.4433	-2.40865	2		28	22	50	67.018	LK
1021	0	9.45531	-3.0167	1	1	21	0		39.267	W
1022	0	9.4636	-3.00155	1	1	9	0		14.556	H
429	0	9.53509	-2.25253	1	1	10	0		15.413	H
666	0	9.54044	-2.29499	1	1	4	0		7.55	H
433	0	9.58039	-2.27059	2		2	5	7	3.524	CW
1039	0	9.61588	-2.85016	1	1	5	0		17.743	H
439	0	9.62245	-2.23078	1	1	8	0		11.653	H
501	0	9.63286	-2.20214	1	1	3	0		6.021	H
1046	0	9.65135	-2.8111	1	1	3	0		4.792	W
672	0	9.66248	-2.16059	1	0	0	81		23.061	Q
673	0	9.66328	-2.15365	1	0	0	2		0.954	Q
504	0	9.68668	-2.15048	1	1	6	0		13.764	L
334	0	9.74481	-2.07572	1	1	6	0		13.94	W
335	0	9.75037	-2.06848	1	1	4	0		7.881	W
511	0	9.75315	-2.0842	1	1	23	0		14.461	H
337	0	9.79384	-2.02658	2		9	3	12	13.497	HK
1057	0	9.79523	-2.67098	1	1	8	0		18.367	H
516	0	9.83195	-2.00552	1	1	7	0		14.879	H
517	0	9.84211	-1.99785	1	1	10	0		23.857	H
343	0	9.8469	-1.9725	2		3	2	5	9.826	WK
342	0	9.84946	-1.97893	2		24	28	52	42.207	WK
434	0	9.85173	-1.93191	1	0	0	4		1.105	Cs
344	0	9.85274	-1.966	2		3	3	6	7.466	WK
345	0	9.86827	-1.96594	2		27	32	59	63.151	WK
787	0	9.87164	-1.96293	1	1	4	0		4.419	W
524	0	9.9193	-1.91925	1	1	9	0		18.771	W
351	0	9.91951	-1.90131	1	1	6	0		14.971	H
793	0	9.93233	-1.90424	1	1	8	0		11.657	H
355	0	9.99616	-1.82255	1	1	4	0		7.348	H
438	0	10.0167	-1.7673	1	1	2	0		2.209	H
356	0	10.0364	-1.79169	1	1	22	0		41.118	L
683	0	10.0448	-1.77337	1	0	0	38		5.592	Q
684	0	10.0477	-1.77033	1	0	0	13		5.035	Q
686	0	10.0511	-1.7672	1	0	0	16		5.817	Q
1076	0	10.0557	-2.40825	1	1	7	0		10.077	H
468	0	10.0598	-1.79481	1	1	11	0		16.696	H
360	0	10.0917	-1.7254	1	0	0	5		1.399	Cs
804	0	10.0949	-1.74086	1	1	6	0		8.655	H
688	0	10.1042	-1.73758	1	1	11	0		30.498	L
1081	0	10.1152	-2.3495	1	1	6	0		12.892	H
532	0	10.1381	-1.69813	1	1	5	0		10.551	H
534	0	10.1832	-1.65343	1	1	7	0		11.914	H
473	0	10.2677	-1.58387	1	1	3	0		5.727	H
363	0	10.2707	-1.54879	2		6	6	12	10.051	LK
441	0	10.2915	-1.49695	1	1	7	0		18.536	H
442	0	10.3283	-1.45697	1	1	3	0		6.887	H
478	0	10.3371	-1.51511	1	1	6	0		7.918	H
817	0	10.3443	-1.49475	1	1	10	0		20.665	W
820	0	10.3518	-1.48326	1	1	3	0		6.224	W
364	0	10.3685	-1.45228	1	1	6	0		14.823	H
365	0	10.3886	-1.43163	1	1	6	0		12.871	L
824	0	10.3929	-1.44099	1	1	2	0		2.044	H
366	0	10.4209	-1.39888	2		6	6	12	11.142	LK
368	0	10.4447	-1.37225	1	0	0	4		1.049	Cs
828	0	10.4463	-1.42443	2		104	114	218	134.554	HK
831	0	10.4611	-1.38414	1	0	0	130		42.718	Q
833	0	10.4665	-1.37193	1	0	0	58		18.378	Q
370	0	10.4704	-1.3492	1	1	7	0		10.68	L
832	0	10.4707	-1.37875	1	1	27	0		57.904	W
555	0	10.4834	-1.35446	1	1	7	0		16.359	H
445	0	10.4947	-1.28899	1	0	0	5		1.142	Cs
840	0	10.4978	-1.3386	1	1	5	0		10.92	W
841	0	10.5005	-1.33695	1	1	7	0		14.86	H
844	0	10.5403	-1.3222	1	1	40	0		105.086	H
372	0	10.5474	-1.27409	1	1	8	0		17.325	W
488	0	10.5521	-1.30238	1	1	10	0		16.223	H
852	0	10.5578	-1.27787	1	1	4	0		8.415	H
854	0	10.5636	-1.27609	1	1	15	0		22.796	L
374	0	10.5748	-1.24321	1	1	3	0		4.953	L
375	0	10.625	-1.1938	1	1	7	0		7.804	L
376	0	10.6302	-1.18684	1	0	0	5		1.289	Cs
875	0	10.6429	-1.20185	1	1	17	0		40.935	L
505	0	10.6727	-1.17924	1	1	4	0		7.071	H
378	0	10.6843	-1.14767	2		18	12	30	54.914	HK
690	0	10.7001	-1.15752	2		13	13	26	87.477	LK
582	0	10.723	-1.11295	1	1	5	0		9.281	H
379	0	10.7304	-1.08786	1	1	3	0		5.874	W
508	0	10.7407	-1.11385	1	1	9	0		16.407	W
1123	0	10.7455	-1.72727	1	1	16	0		41.912	H
509	0	10.7517	-1.10763	1	1	17	0		33.704	W
1124	0	10.7768	-1.6984	1	1	29	0		50.868	H
1125	0	10.7804	-1.68211	1	1	3	0		5.053	H
1126	0	10.7862	-1.67969	1	1	7	0		17.143	H
380	0	10.8105	-1.01628	1		16	0		36.33	H
381	0	10.8242	-1.00478	2		16	21	37	44.297	HK
382	0	10.8274	-0.992315	2		7	14	21	11.085	HK
383	0	10.8356	-0.990666	2		13	13	26	34.402	HK
384	0	10.8643	-0.953476	1	1	3	0		3.867	L
895	0	10.9078	-0.929817	1	1	7	0		15.541	H
385	0	10.9282	-0.889658	1	0	0	3		4.124	Q
454	0	10.9697	-0.81961	1	1	11	0		21.512	H
1134	0	10.9756	-1.48582	1	0	0	5		1.223	Cs
455	0	10.9761	-0.811435	1	1	10	0		15.283	L
456	0	10.9783	-0.805224	1	1	1	0		0.589	L
386	0	10.9836	-0.833331	1	0	0	5		1.123	Cs
387	0	10.9866	-0.830451	1	0	0	6		1.307	Cs
389	0	11.0055	-0.817649	2		13	34	47	23.337	KLW
390	0	11.0128	-0.810653	2		8	8	16	24.295	HK
393	0	11.0513	-0.77399	1	1	11	0		30.882	H
394	0	11.0546	-0.76453	2		6	3	9	8.692	HK
910	0	11.0992	-0.739494	1	1	10	0		19.155	W
912	0	11.1034	-0.732446	1	1	4	0		9.188	W
915	0	11.1072	-0.729107	1	0	0	52		10.8	Q
914	0	11.1081	-0.72918	1	1	6	0		14.197	W
395	0	11.1178	-0.700605	2		5	5	10	6.285	HK
462	0	11.1218	-0.66447	1	1	5	0		10.478	H
396	0	11.122	-0.696761	1	1	4	0		7.384	H
398	0	11.1335	-0.690297	1	1	9	0		25.849	H
594	0	11.1337	-0.701325	1	1	4	0		6.058	H
920	0	11.1418	-0.702773	1	1	24	0		40.39	L
399	0	11.1462	-0.679161	1	1	16	0		31.425	W
923	0	11.1722	-0.66307	1	1	5	0		7.016	H
724	0	11.1748	-0.691317	1	1	28	0		118.03	L
527	0	11.1948	-0.655559	1	0	0	7		1.363	Cs
1146	0	11.2057	-1.25812	1	1	5	0		9.604	H
930	0	11.215	-0.619151	1	1	2	0		2.891	W
725	0	11.2336	-0.617863	1	1	3	0		65.193	L
726	0	11.2374	-0.617039	1	1	8	0		76.079	H
401	0	11.2523	-0.566855	2		6	6	12	9.036	HK
402	0	11.2542	-0.562686	2		1	1	2	0.747	HK
1151	0	11.2796	-1.18741	1	1	13	0		21.134	H
602	0	11.2868	-0.550707	1	1	9	0		14.953	L
604	0	11.2974	-0.538843	1	1	4	0		10.386	L
605	0	11.3023	-0.535557	1	1	8	0		16.181	L
934	0	11.3146	-0.521395	1	1	5	0		9.41	H
936	0	11.3299	-0.5113	1	1	14	0		28.246	H
938	0	11.3361	-0.5012	1	1	6	0		14.105	H
404	0	11.3459	-0.47112	1	0	0	6		1.253	Cs
939	0	11.3476	-0.491239	1	1	9	0		19.643	H
407	0	11.3546	-0.465897	2		8	13	21	13.918	KL
941	0	11.358	-0.478479	1	1	6	0		11.362	H
409	0	11.3686	-0.451696	1	1	7	0		13.019	L
471	0	11.3986	-0.388237	1	1	6	0		12.742	H
613	0	11.4473	-0.392775	1	1	7	0		24.422	H
737	0	11.4525	-0.366052	1	0	0	16		6.757	Q
738	0	11.4545	-0.36423	1	0	0	18		7.305	Q
739	0	11.457	-0.361435	1	0	0	13		6.537	Q
423	0	11.4583	-0.358622	1	0	0	5		1.049	Cs
740	0	11.4597	-0.358451	1	0	0	13		5.417	Q
741	0	11.4616	-0.355986	1	0	0	8		3.464	Q
742	0	11.4652	-0.352019	1	0	0	6		2.006	Q
473	0	11.4694	-0.321551	1	1	15	0		27.385	H
474	0	11.5056	-0.310052	1	1	43	0		116.378	H
546	0	11.5448	-0.312524	1	1	19	0		26.494	L
478	0	11.5561	-0.245461	1	1	32	0		65.748	L
547	0	11.5598	-0.301893	1	1	14	0		41.992	L
961	0	11.5627	-0.271406	1	0	0	25		2.695	Q
484	0	11.5638	-0.224491	1	1	7	0		17.796	H
483	0	11.5662	-0.225632	1	1	12	0		30.544	L
962	0	11.5717	-0.269194	1	0	0	110		27.387	Q
964	0	11.5763	-0.260929	1	0	0	41		13.872	Q
965	0	11.5826	-0.256598	1	0	0	58		20.987	Q
440	0	11.6	-0.218876	1	1	4	0		7.826	L
1186	0	11.6131	-0.255018	1	0	0	22		5.086	Q
487	0	11.6153	-0.170046	2		4	3	7	7.229	LK
967	0	11.6159	-0.220886	1	1	6	0		12.448	H
1187	0	11.6166	-0.253013	1	0	0	35		10.683	Q
488	0	11.6299	-0.156677	1	1	5	0		11.527	H
444	0	11.6595	-0.159519	1	1	6	0		8.323	L
970	0	11.6974	-0.138965	1	1	5	0		11.049	W
760	0	11.7058	-0.129881	1	0	0	54		8.379	Q
761	0	11.7066	-0.126801	1	0	0	2		0.242	Q
972	0	11.7076	-0.127829	1	0	0	31		7.414	Q
762	0	11.7088	-0.125944	1	0	0	25		4.962	Q
971	0	11.7127	-0.132278	1	1	16	0		42.024	W
554	0	11.7581	-0.0976178	1	1	10	0		20.544	L
764	0	11.759	-0.0786514	1	0	0	54		15.383	Q
977	0	11.7773	-0.0617519	1	1	13	0		20.716	L
627	0	11.8337	-0.00733083	1	1	15	0		27.645	H
629	0	11.8384	0.000378889	1	1	10	0		16.856	W
632	0	11.8558	0.0166108	1	1	9	0		20.971	W
634	0	11.8798	0.0418639	1	1	7	0		16.576	W
981	0	11.88	0.0338556	1	1	19	0		46.227	L
638	0	11.8985	0.0623558	1	1	10	0		10.275	W
1199	0	11.9088	0.0392875	1	0	0	42		10.1	Q
1201	0	11.9259	-0.542833	1	1	11	0		27.401	H
643	0	11.9412	0.103389	1	1	11	0		16.197	H
644	0	11.9531	0.112742	1	1	10	0		25.38	H
646	0	11.9545	0.118975	1	1	4	0		7.863	W
983	0	11.9708	0.133189	1	0	0	71		15.415	Q
985	0	11.9749	0.137815	1	0	0	52		13.443	Q
987	0	11.9764	0.141878	1	0	0	13		4.163	Q
988	0	11.9773	0.143454	1	0	0	9		1.982	Q
989	0	11.9842	0.144881	1	0	0	79		21.61	Q
647	0	11.986	0.122777	1	1	45	0		107.47	H
648	0	11.9892	0.153651	1	1	4	0		7.992	H
990	0	12.002	0.163869	1	0	0	49		17.252	Q
991	0	12.0143	0.17942	1	1	3	0		5.708	H
70	1	0.103239	-12.363	1	1	12	0		18.393	H
71	1	0.136032	-12.3266	1	1	4	0		5.59	H
76	1	0.203164	-12.2659	1	1	16	0		28.802	H
80	1	0.211125	-12.256	1	1	11	0		21.749	H
81	1	0.228826	-12.2331	1	1	4	0		3.009	W
82	1	0.231085	-12.2311	1	1	3	0		3.95	W
84	1	0.237836	-12.2236	1	0	0	6		1.297	Cs
83	1	0.23807	-12.2286	1	1	12	0		20.18	H
85	1	0.239996	-12.2221	1	1	2	0		3.664	H
91	1	0.269255	-12.1922	1	0	0	2		1.369	R
88	1	0.269676	-12.2039	1	1	25	0		44.715	L
93	1	0.27042	-12.1911	1	0	0	3		1.626	R
94	1	0.271613	-12.1904	1	0	0	5		3.128	R
95	1	0.272655	-12.1892	1	0	0	4		2.709	R
96	1	0.27387	-12.1878	1	0	0	2		2.167	R
115	1	0.418085	-12.0462	1	1	6	0		11.578	H
129	1	0.469951	-11.9941	1	1	7	0		10.409	H
132	1	0.473925	-11.9895	1	1	3	0		8.384	H
150	1	0.603965	-11.8575	1	0	0	6		1.354	Cs
160	1	0.647277	-11.8143	1	0	0	7		1.554	Cs
177	1	0.745962	-11.7228	1	1	11	0		27.38	H
178	1	0.753754	-11.7091	1	1	3	0		6.117	H
179	1	0.797119	-11.6644	1	0	0	6		1.397	Cs
180	1	0.809308	-11.6519	1	0	0	1		0.414	Cs
181	1	0.810358	-11.6515	1	0	0	4		2.609	Cs
182	1	0.811324	-11.6499	1	0	0	1		0.442	Cs
183	1	0.816762	-11.6495	1	0	0	22		18.601	C
184	1	0.818813	-11.6439	1	0	0	5		5.832	C
185	1	0.823342	-11.6413	1	0	0	11		12.608	C
189	1	0.86673	-11.5947	1	0	0	2		1.269	Cs
192	1	0.967215	-11.4963	1	1	5	0		8.697	L
193	1	0.968788	-11.4931	1	1	2	0		2.804	L
194	1	1.0425	-11.4737	2		79	58	137	198.219	LC
198	1	1.04541	-10.8224	1	0	0	24		4.08	Q
199	1	1.04683	-10.8207	1	0	0	4		3.057	Q
200	1	1.04799	-10.8193	1	0	0	4		2.261	Q
201	1	1.06161	-11.4135	2		26	26	52	50.4	LC
203	1	1.08899	-11.3781	2		10	9	19	21.538	WC
204	1	1.09275	-11.3706	2		4	4	8	7.988	WC
205	1	1.09811	-11.3663	2		4	4	8	12.055	WC
206	1	1.14699	-11.3198	2		12	11	23	20.543	WC
208	1	1.15422	-11.3125	2		10	10	20	20.021	WC
210	1	1.15968	-11.3051	2		6	6	12	13.319	WC
211	1	1.16131	-11.3018	1	1	5	0		7.1	H
214	1	1.16748	-11.2995	1	1	11	0		20.961	H
218	1	1.21521	-11.258	2		24	34	58	43.503	CH
220	1	1.21838	-11.2446	2		3	4	7	6.648	HC
222	1	1.25471	-11.215	2		19	22	41	31.098	HC
223	1	1.25663	-11.2046	2		1	1	2	0.528	HC
225	1	1.28005	-11.2017	2		27	28	55	74.262	HC
227	1	1.28491	-11.1795	2		5	5	10	11.998	HC
228	1	1.29973	-11.162	1	1	2	0		2.308	H
229	1	1.3062	-11.1581	2		8	15	23	11.559	CsHK
232	1	1.31987	-11.1459	2		10	15	25	16.763	CL
230	1	1.3237	-11.1512	2		19	18	37	49.677	HC
234	1	1.38069	-11.0818	2		2	8	10	4.829	CsH
235	1	1.38416	-11.0796	2		9	9	18	9.571	CW
236	1	1.39537	-11.0754	2		15	20	35	34.678	LR
247	1	1.54241	-10.9363	2		29	25	54	63.498	HC
248	1	1.54248	-10.9363	2		29	24	53	63.466	HC
250	1	1.54279	-10.3248	1	0	0	8		3.213	Q
251	1	1.55384	-10.3135	1	0	0	13		2.317	Q
252	1	1.55486	-10.3124	1	0	0	6		1.977	Q
253	1	1.55802	-10.3096	1	0	0	9		3.455	Q
254	1	1.56295	-10.9027	2		10	21	31	16.519	LC
257	1	1.60122	-10.2658	1	0	0	5		1.222	Q
256	1	1.61506	-10.8642	2		21	14	35	65.373	HC
260	1	1.62602	-10.8398	1	1	8	0		17.051	W
263	1	1.64999	-10.813	1	1	4	0		6.743	H
264	1	1.65247	-10.8101	1	1	3	0		5.277	H
265	1	1.65734	-10.8061	1	1	4	0		8.402	H
266	1	1.65926	-10.802	1	1	1	0		0.478	H
267	1	1.6739	-10.788	1	1	2	0		2.978	H
269	1	1.6795	-10.7832	2		3	7	10	5.651	CsHK
271	1	1.73181	-10.1359	1	0	0	19		3.611	Q
272	1	1.73586	-10.1344	1	0	0	17		13.074	Q
273	1	1.73662	-10.1301	1	0	0	1		0.256	Q
274	1	1.7379	-10.1288	1	0	0	1		0.228	Q
275	1	1.75407	-10.7123	2		3	18	21	18.862	RL
276	1	1.75765	-10.7053	2		3	4	7	6.572	LR
277	1	1.78998	-10.6719	2		2	2	4	2.829	HC
278	1	1.80851	-10.6595	2		8	2	10	24.836	HC
283	1	1.83155	-10.6335	1	1	6	0		14.337	H
284	1	1.84708	-10.6156	2		3	7	10	5.816	CsHK
286	1	1.86534	-10.6056	2		16	21	37	35.313	HC
288	1	1.88482	-10.578	2		3	15	18	6.004	CL
290	1	1.95748	-10.5173	2		21	22	43	49.129	HC
291	1	1.96147	-10.5	2		1	5	6	1.144	CsH
299	1	2.0797	-10.3846	2		8	2	10	11.551	LC
300	1	2.08065	-10.3838	1	1	6	0		11.911	W
301	1	2.09179	-10.3776	2		11	22	33	29.93	LC
303	1	2.14953	-10.3121	1	0	0	8		1.863	Cs
309	1	2.2466	-10.2247	2		26	14	40	36.642	LC
373	1	2.59247	-9.86898	1	0	0	5		1.225	Cs
375	1	2.6206	-9.84093	1	0	0	5		1.494	Cs
377	1	2.66937	-9.19866	1	0	0	24		4.933	Q
378	1	2.67201	-9.19643	1	0	0	32		6.401	Q
379	1	2.68198	-9.78201	2		7	9	16	10.346	HC
381	1	2.71069	-9.75341	2		8	11	19	10.753	HC
382	1	2.712	-9.74945	2		1	7	8	1.249	CsHK
380	1	2.71573	-9.16106	1	0	0	170		36.465	Q
383	1	2.72063	-9.14799	1	0	0	15		7.024	Q
385	1	2.75357	-9.71273	1	1	9	0		18.69	L
388	1	2.75985	-9.11435	1	0	0	96		27.141	Q
390	1	2.76292	-9.10631	1	0	0	33		9.254	Q
392	1	2.76676	-9.1033	1	0	0	33		12.211	Q
393	1	2.77678	-9.68537	2		3	6	9	3.76	HC
394	1	2.78637	-9.6751	1	0	0	5		1.295	Cs
396	1	2.96512	-9.49963	2		7	4	11	13.105	HC
400	1	3.00746	-9.45561	1	1	9	0		7.081	W
401	1	3.008	-9.45322	1	1	1	0		0.384	W
402	1	3.01207	-9.45245	1	1	11	0		12.255	W
403	1	3.01422	-9.44812	1	1	3	0		4.434	W
409	1	3.06387	-9.39757	1	0	0	5		1.202	Cs
408	1	3.06406	-9.39869	2		4	2	6	5.902	HC
411	1	3.09178	-9.37758	2		11	22	33	29.705	LC
413	1	3.20629	-9.25495	1	1	1	0		0.475	H
415	1	3.21446	-9.24753	1	1	2	0		3.152	H
417	1	3.26699	-9.19443	1	0	0	5		1.111	Cs
418	1	3.29067	-9.1708	1	0	0	7		1.273	Cs
420	1	3.30852	-9.15294	1	0	0	7		1.263	Cs
421	1	3.36268	-9.09875	1	0	0	5		1.162	Cs
428	1	3.45611	-9.00525	1	0	0	4		0.93	Cs
434	1	3.54175	-8.9197	1	0	0	6		1.222	Cs
436	1	3.55375	-8.9077	1	0	0	6		1.192	Cs
438	1	3.57222	-8.29868	1	0	0	56		15.245	Q
439	1	3.57273	-8.29401	1	0	0	1		0.242	Q
440	1	3.57398	-8.29342	1	0	0	6		2.654	Q
441	1	3.57911	-8.29044	1	0	0	14		10.389	Q
442	1	3.59598	-8.86553	1	0	0	7		1.454	Cs
443	1	3.59862	-8.86277	1	0	0	5		1.02	Cs
447	1	3.68201	-8.78197	2		7	2	9	10.306	HC
449	1	3.70374	-8.16601	1	0	0	34		11.101	Q
450	1	3.70453	-8.16219	1	0	0	1		0.178	Q
448	1	3.7046	-8.76147	2		8	8	16	17.828	HC
451	1	3.70574	-8.16099	1	0	0	1		0.211	Q
452	1	3.70682	-8.75469	1	0	0	6		1.445	Cs
453	1	3.71074	-8.75339	2		8	14	22	10.864	HC
454	1	3.71572	-8.15107	1	0	0	2		0.437	Q
455	1	3.71754	-8.15049	1	0	0	10		4.936	Q
456	1	3.71938	-8.14759	1	0	0	4		1.084	Q
457	1	3.73774	-8.72369	1	0	0	6		1.172	Cs
459	1	3.75014	-8.7115	1	0	0	6		1.93	Cs
460	1	3.7507	-8.71072	1	0	0	2		1.081	Cs
461	1	3.75147	-8.70995	1	0	0	2		1.121	Cs
463	1	3.75208	-8.70933	1	0	0	3		1.051	Cs
464	1	3.75273	-8.70865	1	0	0	3		0.969	Cs
465	1	3.7536	-8.70797	1	0	0	5		1.637	Cs
467	1	3.75441	-8.11231	1	0	0	1		0.194	Q
466	1	3.75474	-8.70703	1	0	0	5		2.374	Cs
469	1	3.75554	-8.70583	1	0	0	3		0.929	Cs
470	1	3.75676	-8.70496	1	0	0	6		2.181	Cs
468	1	3.76438	-8.11185	1	0	0	50		34.422	Q
471	1	3.76582	-8.69594	1	0	0	8		2.303	Cs
472	1	3.76676	-8.69492	1	0	0	7		2.031	Cs
473	1	3.76752	-8.69385	1	0	0	3		0.95	Cs
474	1	3.76818	-8.6934	1	0	0	5		1.697	Cs
475	1	3.76932	-8.69257	1	0	0	5		2.823	Cs
476	1	3.76997	-8.69139	1	0	0	2		0.899	Cs
477	1	3.77094	-8.69072	1	0	0	4		1.98	Cs
479	1	3.77291	-8.6891	1	0	0	4		3.232	C
481	1	3.77684	-8.68539	2		3	4	7	4.034	HC
485	1	3.8722	-8.58927	1	0	0	5		1.304	Cs
487	1	3.8974	-8.56409	1	0	0	7		1.353	Cs
494	1	4.12157	-8.33988	1	0	0	5		1.202	Cs
498	1	4.23969	-8.22982	2		12	20	32	30.227	HC
499	1	4.28386	-8.18847	2		14	12	26	40.395	HC
504	1	4.30274	-8.17618	2		22	17	39	64.128	HC
507	1	4.35688	-8.10432	1	0	0	1		0.333	Cs
508	1	4.38849	-8.07298	1	0	0	2		1.313	R
516	1	4.43886	-8.02962	2		12	10	22	26.52	HC
517	1	4.44274	-8.0195	2		2	1	3	4.059	HC
519	1	4.48566	-7.98211	2		11	9	20	23.936	HC
521	1	4.49044	-7.97384	2		6	5	11	11.406	HR
522	1	4.50278	-7.96716	2		14	11	25	31.783	HC
524	1	4.50821	-7.95718	2		7	7	14	15.414	HR
527	1	4.52046	-7.94527	2		11	22	33	16.655	RL
529	1	4.55266	-7.92243	2		24	21	45	50.336	WC
536	1	4.64105	-7.82049	2		1	6	7	1.541	CsHK
537	1	4.7346	-7.72703	1	0	0	8		1.858	Cs
539	1	4.74355	-7.71792	1	0	0	6		1.293	Cs
538	1	4.7493	-7.722	2		15	17	32	36.695	HC
542	1	4.81276	-7.65041	1	1	4	0		7.425	W
550	1	4.87678	-7.58762	2		7	12	19	11.86	CsHK
551	1	4.88279	-7.58298	2		6	8	14	16.774	HC
552	1	4.88672	-7.57663	2		3	3	6	8.081	HC
555	1	4.93107	-6.93953	1	0	0	44		14.174	Q
557	1	4.93665	-6.93511	1	0	0	63		18.362	Q
560	1	4.94541	-6.92955	1	0	0	113		29.879	Q
561	1	4.94957	-6.92074	1	0	0	49		13.12	Q
568	1	5.07529	-7.38611	2		1	5	6	1.053	CsH
570	1	5.09855	-7.36395	1	0	0	6		4.972	C
571	1	5.10009	-7.36135	1	0	0	2		1.185	Cs
575	1	5.13608	-7.32527	1	0	0	2		0.843	Cs
576	1	5.21596	-7.24558	1	0	0	5		1.543	Cs
580	1	5.27468	-7.1919	2		12	10	22	19.696	HC
582	1	5.34681	-7.11756	1	1	6	0		11.714	L
584	1	5.42769	-7.03659	2		6	5	11	11.403	LC
585	1	5.43296	-7.0285	1	0	0	5		1.272	Cs
586	1	5.43471	-7.02676	1	0	0	5		1.3	Cs
587	1	5.43767	-7.02378	1	0	0	5		1.229	Cs
589	1	5.45116	-7.01033	1	0	0	5		1.357	Cs
588	1	5.45607	-7.01674	2		18	17	35	42.112	HC
590	1	5.47546	-6.986	1	0	0	4		1.243	Cs
591	1	5.4807	-6.38722	1	0	0	10		4.494	Q
592	1	5.48211	-6.38506	1	0	0	7		1.809	Q
593	1	5.48344	-6.38419	1	0	0	10		3.461	Q
599	1	5.54773	-6.91376	1	0	0	5		1.343	Cs
607	1	5.63823	-6.82748	1	1	6	0		16.538	H
606	1	5.64248	-6.82819	2		14	18	32	34.424	WC
613	1	5.65913	-6.82112	1	1	24	0		68.883	H
639	1	5.71781	-6.74722	1	1	9	0		14.082	H
640	1	5.71915	-6.74209	1	1	1	0		0.485	H
642	1	5.90031	-6.60809	2		108	42	150	170.241	HC
643	1	5.91064	-6.55176	2		3	4	7	4.638	WC
653	1	6.06467	-6.40422	2		12	27	39	28.013	LC
656	1	6.14792	-6.3135	1	0	0	5		1.128	Cs
659	1	6.21108	-6.25239	1	1	4	0		8.508	L
662	1	6.23575	-6.22844	1	1	5	0		11.07	H
663	1	6.2543	-6.2088	2		4	3	7	7.132	HC
666	1	6.26373	-6.20364	2		13	13	26	22.501	LC
669	1	6.31296	-6.14986	1	1	4	0		6.143	H
670	1	6.31647	-6.14644	1	1	3	0		6.485	H
673	1	6.40685	-6.06263	2		14	11	25	30.156	LC
675	1	6.46657	-5.99536	1	1	2	0		2.957	H
676	1	6.47684	-5.98463	1	0	0	5		1.271	Cs
677	1	6.48164	-5.98388	1	1	9	0		15.853	W
679	1	6.50273	-5.95876	1	0	0	5		1.357	Cs
680	1	6.55977	-5.90433	1	1	5	0		10.743	W
681	1	6.59316	-5.87417	2		8	17	25	22.392	HC
683	1	6.6406	-5.82086	1	0	0	5		1.257	Cs
685	1	6.67551	-5.79021	1	1	8	0		16.568	H
687	1	6.68185	-5.78129	1	1	4	0		7.286	H
689	1	6.698	-5.76937	2		10	13	23	22.535	HC
709	1	6.8331	-5.63163	1	1	7	0		13.028	H
710	1	6.83926	-5.62851	2		11	11	22	23.972	LC
711	1	6.84506	-5.62263	1	1	11	0		23.679	L
713	1	6.90503	-5.55648	1	0	0	6		1.429	Cs
718	1	7.00294	-5.46359	1	1	10	0		19.505	L
726	1	7.03656	-5.42556	1	1	3	0		3.657	H
727	1	7.04263	-5.4219	2		14	14	28	12.299	WC
731	1	7.06665	-5.39742	1	1	5	0		10.671	H
732	1	7.08348	-5.38051	1	1	8	0		10.349	H
733	1	7.10271	-5.36637	2		16	14	30	28.713	HC
735	1	7.11604	-5.34756	2		6	6	12	8.96	HC
736	1	7.1187	-5.34363	2		2	1	3	4.399	HC
740	1	7.21148	-5.25803	1	1	12	0		30.24	H
741	1	7.21875	-5.24714	1	1	6	0		17.204	H
742	1	7.22086	-5.24165	1	0	0	12		5.057	C
747	1	7.29529	-5.16879	2		7	9	16	10.703	LC
752	1	7.32728	-5.13591	2		4	9	13	7.474	CsHK
754	1	7.32898	-5.13272	2		2	2	4	2.106	HC
757	1	7.33126	-5.12999	2		1	1	2	0.488	HC
761	1	7.40164	-5.06021	1	0	0	4		2.651	Cs
762	1	7.40413	-5.05738	1	0	0	2		1.46	Cs
763	1	7.40532	-5.05621	1	0	0	2		1.489	Cs
764	1	7.4063	-5.05517	1	0	0	2		1.319	Cs
767	1	7.43458	-5.02936	2		6	11	17	10.183	CsHK
786	1	7.54358	-4.32644	1	0	0	37		12.079	Q
788	1	7.54416	-4.32256	1	0	0	1		0.199	Q
792	1	7.54959	-4.91188	1	0	0	5		1.318	Cs
795	1	7.58187	-4.87959	1	0	0	6		1.262	Cs
796	1	7.59237	-4.86909	1	0	0	5		1.262	Cs
798	1	7.60913	-4.85445	2		9	10	19	8.887	CW
811	1	7.66762	-4.79364	2		1	1	2	0.526	HC
826	1	7.77977	-4.6817	1	0	0	5		1.319	Cs
828	1	7.81263	-4.05459	1	0	0	12		1.994	Q
847	1	7.97277	-4.4887	1	0	0	5		1.29	Cs
848	1	7.97391	-4.48768	1	0	0	7		1.73	Cs
850	1	7.98628	-4.4828	1	1	14	0		28.676	L
852	1	8.02506	-4.47159	1	1	55	0		127.921	L
857	1	8.07564	-4.38587	1	0	0	5		1.432	Cs
858	1	8.08491	-4.37844	1	1	6	0		8.067	W
859	1	8.0934	-4.36811	1	0	0	7		1.417	Cs
860	1	8.10535	-4.35616	1	0	0	5		1.432	Cs
862	1	8.11913	-4.34237	1	0	0	6		1.39	Cs
866	1	8.18397	-4.27752	1	0	0	5		1.361	Cs
868	1	8.22389	-4.24641	2		12	11	23	33.067	HC
869	1	8.23803	-4.2357	2		16	16	32	45.449	HC
872	1	8.25005	-4.21139	1	0	0	5		1.163	Cs
895	1	8.44695	-4.01455	1	0	0	5		1.404	Cs
901	1	8.50438	-3.9571	1	0	0	5		1.304	Cs
906	1	8.64515	-3.84366	1	1	41	0		99.712	H
908	1	8.64879	-3.81651	2		7	11	18	15.086	WC
909	1	8.65484	-3.81195	1	1	8	0		20.435	H
910	1	8.65988	-3.8028	2		3	2	5	5.648	HC
920	1	8.71189	-3.76103	1	1	14	0		42.532	H
921	1	8.74711	-3.74824	1	1	39	0		123.269	H
934	1	8.94699	-3.51459	1	0	0	8		1.664	Cs
935	1	8.9524	-3.50982	2		2	8	10	4.011	CsHK
936	1	8.95426	-3.50772	2		2	2	4	3.097	HC
940	1	9.03777	-3.42622	2		7	7	14	10.369	HC
952	1	9.08298	-3.37872	1	0	0	2		2.126	Cs
954	1	9.08689	-3.37746	1	0	0	16		11.65	C
956	1	9.08753	-3.37372	1	0	0	1		0.481	Cs
957	1	9.08861	-3.373	1	0	0	2		1.805	Cs
955	1	9.08902	-3.37415	2		4	4	8	7.428	LC
958	1	9.08955	-3.37204	1	0	0	2		1.724	Cs
959	1	9.0904	-3.37088	1	0	0	1		0.602	Cs
960	1	9.09159	-3.37003	1	0	0	2		1.864	Cs
961	1	9.09292	-3.36879	1	0	0	2		2.165	Cs
962	1	9.09365	-3.3676	1	0	0	1		0.501	Cs
963	1	9.14548	-3.31654	2		2	7	9	3.283	WC
968	1	9.24254	-3.23266	1	1	20	0		50.73	L
969	1	9.2451	-3.22711	2		19	44	63	39.961	CW
981	1	9.3062	-3.15532	1	0	0	5		1.464	Cs
982	1	9.30817	-3.15327	1	0	0	5		1.163	Cs
983	1	9.30848	-3.15279	1	0	0	2		0.602	Cs
984	1	9.30881	-3.1525	1	0	0	3		0.742	Cs
985	1	9.30921	-3.1521	1	0	0	3		0.721	Cs
986	1	9.31032	-3.15098	1	0	0	2		0.661	Cs
988	1	9.31181	-3.14948	1	0	0	2		0.662	Cs
989	1	9.31231	-3.14897	1	0	0	2		0.601	Cs
990	1	9.31351	-3.14788	1	0	0	3		1.002	Cs
991	1	9.31435	-3.14694	1	0	0	2		0.641	Cs
992	1	9.31479	-3.14645	1	0	0	2		0.481	Cs
993	1	9.31527	-3.14611	1	0	0	3		0.983	Cs
994	1	9.3169	-3.14441	1	0	0	3		0.701	Cs
995	1	9.31937	-3.14208	1	0	0	4		1.203	Cs
998	1	9.32675	-3.13477	1	0	0	4		1.444	Cs
1000	1	9.33726	-3.12428	1	0	0	4		1.524	Cs
1003	1	9.35307	-2.51409	1	0	0	18		1.781	Q
1002	1	9.35612	-3.10934	2		7	7	14	15.653	HC
1004	1	9.35705	-2.51322	1	0	0	32		12.969	Q
1005	1	9.35845	-2.50851	1	0	0	3		1.054	Q
1006	1	9.36076	-2.50785	1	0	0	9		6.966	Q
1007	1	9.36237	-2.50455	1	0	0	3		0.912	Q
1009	1	9.36311	-2.50382	1	0	0	3		0.954	Q
1010	1	9.36592	-2.50317	1	0	0	14		8.739	Q
1023	1	9.4711	-2.99046	1	0	0	6		1.604	Cs
1032	1	9.54134	-2.9228	2		6	6	12	10.917	LC
1035	1	9.56574	-2.8988	2		6	4	10	12.351	HC
1037	1	9.58588	-2.87565	1	0	0	5		1.504	Cs
1040	1	9.6198	-2.84244	1	0	0	5		4.09	C
1041	1	9.6211	-2.84048	1	0	0	2		1.664	Cs
1042	1	9.62259	-2.83867	1	0	0	1		0.542	Cs
1043	1	9.62373	-2.83751	1	0	0	1		0.462	Cs
1045	1	9.65734	-2.81463	2		17	17	34	39.101	HC
1050	1	9.71115	-2.75227	1	1	6	0		8.301	H
1051	1	9.71693	-2.74971	1	1	12	0		19.919	L
1056	1	9.79267	-2.67218	2		7	5	12	13.47	HC
1064	1	9.95082	-2.51064	1	0	0	5		1.243	Cs
1067	1	10.0247	-2.43689	1	0	0	6		1.564	Cs
1069	1	10.0425	-2.41906	1	1	2	0		1.684	L
1079	1	10.0698	-2.39179	1	0	0	6		1.624	Cs
1080	1	10.0825	-2.379	1	0	0	5		1.343	Cs
1082	1	10.1282	-2.33496	2		5	8	13	7.524	LC
1083	1	10.1325	-2.32912	1	0	0	6		1.664	Cs
1084	1	10.1368	-2.32585	2		3	7	10	5.696	HC
1087	1	10.1778	-2.29427	2		1	28	29	39.395	CL
1093	1	10.2856	-2.1759	1	0	0	6		1.323	Cs
1105	1	10.4928	-1.97381	2		10	10	20	19.931	HC
1118	1	10.682	-1.77949	1	0	0	6		1.364	Cs
1128	1	10.86	-1.6016	1	0	0	6		1.684	Cs
1130	1	10.8791	-1.58873	2		11	10	21	24.283	HC
1132	1	10.9443	-1.5172	1	0	0	7		1.443	Cs
1137	1	11.01	-1.45434	1	1	6	0		11.629	H
1142	1	11.1144	-1.3471	1	0	0	6		1.544	Cs
1145	1	11.1733	-1.28816	1	0	0	5		1.403	Cs
1147	1	11.2275	-0.642344	1	0	0	72		11.382	Q
1148	1	11.2305	-1.23334	2		5	4	9	9.977	WC
1149	1	11.2456	-1.21569	2		1	1	2	0.71	HC
1150	1	11.2585	-1.20363	2		2	2	4	3.655	WC
1153	1	11.3179	-0.54893	1	0	0	3		0.712	Q
1155	1	11.3214	-0.545594	1	0	0	4		1.211	Q
1154	1	11.3237	-1.14162	1	1	7	0		15.239	H
1159	1	11.3747	-1.09256	1	1	9	0		22.123	H
1160	1	11.3907	-1.07327	1	1	5	0		10.13	L
1161	1	11.4056	-0.465815	1	0	0	75		17.016	Q
1162	1	11.4101	-0.460257	1	0	0	32		13.333	Q
1167	1	11.4565	-1.01072	2		10	9	19	22.107	LC
1168	1	11.4646	-1.00288	1	1	10	0		23.12	H
1169	1	11.4724	-0.989016	2		1	5	6	1.272	CsH
1171	1	11.5173	-0.948176	1	1	7	0		15.552	W
1172	1	11.5385	-0.333778	1	0	0	73		20.213	Q
1173	1	11.5399	-0.327724	1	0	0	7		3.533	Q
1174	1	11.5407	-0.326236	1	0	0	2		0.926	Q
1176	1	11.5698	-0.89565	2		8	8	16	15.749	HC
1178	1	11.5787	-0.288472	1	0	0	20		1.937	Q
1179	1	11.5794	-0.287401	1	0	0	2		0.499	Q
1180	1	11.5821	-0.286208	1	0	0	16		5.983	Q
1181	1	11.5831	-0.283577	1	0	0	1		0.185	Q
1182	1	11.5849	-0.282346	1	0	0	5		1.98	Q
1183	1	11.5861	-0.281261	1	0	0	5		2.621	Q
1184	1	11.591	-0.279811	1	0	0	37		15.1	Q
1185	1	11.5974	-0.867993	2		7	7	14	15.489	HC
1189	1	11.6389	-0.830227	1	1	17	0		28.855	H
1196	1	11.7357	-0.730347	1	1	8	0		17.758	L
1198	1	11.8607	-0.607021	2		12	12	24	23.82	LC
1202	1	11.949	-0.524978	2		18	13	31	46.217	HC
1204	1	12.059	-0.404474	2		4	9	13	8.61	WC
1205	1	12.1189	-0.344516	2		3	9	12	8.258	RL
1206	1	12.1307	-0.339589	2		14	14	28	32.878	HC
1207	1	12.1963	-0.270481	2		9	3	12	20.476	HC
1209	1	12.3103	-0.155468	2		7	7	14	16.7	HC
1210	1	12.333	-0.133608	2		13	14	27	19.724	LC
1214	1	12.6753	0.212161	2		4	5	9	7.297	LC
1215	1	12.7801	0.316583	2		4	3	7	8.623	LC
3	2	-1.01567	-13.479	1	1	5	0		8.028	L
16	2	-0.887461	-13.3538	1	1	7	0		18.691	H
18	2	-0.870821	-13.3323	1	0	0	5		1.169	Cs
19	2	-0.863975	-13.3266	1	1	4	0		5.461	H
37	2	-0.600798	-12.4693	1	0	0	32		6.483	Q
38	2	-0.600297	-12.467	1	0	0	1		0.156	Q
39	2	-0.596652	-12.4666	1	0	0	25		11.715	Q
41	2	-0.594789	-12.4622	1	0	0	6		2.716	Q
42	2	-0.593968	-12.4608	1	0	0	2		0.569	Q
57	2	-0.257805	-12.7194	1	0	0	8		1.754	Cs
60	2	-0.179638	-12.6428	1	1	4	0		7.401	W
62	2	-0.160697	-12.6223	1	0	0	8		1.654	Cs
64	2	0.0360208	-12.4325	1	1	11	0		26.549	L
69	2	0.0988419	-11.7702	1	0	0	57		8.46	Q
74	2	0.196716	-12.2699	1	1	12	0		19.878	L
77	2	0.199981	-12.2625	1	1	3	0		5.091	H
78	2	0.201569	-12.2597	1	1	1	0		0.428	H
97	2	0.282322	-12.1843	2		12	10	22	19.756	HC
103	2	0.314503	-12.155	1	1	14	0		30.157	L
113	2	0.417948	-12.0579	1	1	29	0		52.993	L
117	2	0.435357	-12.029	2		6	5	11	11.548	LC
118	2	0.445316	-12.0161	1	0	0	5		1.269	Cs
119	2	0.451699	-12.015	1	1	12	0		20.231	L
123	2	0.458177	-12.0087	1	1	11	0		20.644	L
125	2	0.458771	-12.0027	1	0	0	5		1.198	Cs
121	2	0.463726	-12.0091	2		18	15	33	42.199	HC
130	2	0.470665	-11.9916	1	1	3	0		4.163	L
131	2	0.47872	-11.9897	1	1	15	0		26.246	L
133	2	0.486964	-11.9819	1	1	15	0		27.944	W
138	2	0.528956	-11.9328	1	1	2	0		2.253	W
139	2	0.537078	-11.9316	1	1	14	0		27.248	H
141	2	0.543208	-11.9218	1	1	8	0		14.159	L
144	2	0.550397	-11.3203	1	0	0	48		14.679	Q
142	2	0.550479	-11.9169	1	1	12	0		22.466	L
145	2	0.551943	-11.3155	1	0	0	6		2.815	Q
146	2	0.553012	-11.3143	1	0	0	6		2.147	Q
147	2	0.554374	-11.3124	1	0	0	2		0.541	Q
148	2	0.555331	-11.9061	1	0	0	5		1.226	Cs
151	2	0.611088	-11.8504	1	0	0	7		1.454	Cs
153	2	0.622807	-11.8416	1	1	7	0		11.782	H
155	2	0.633532	-11.8328	2		10	10	20	18.65	HC
156	2	0.641512	-11.2282	1	0	0	45		11.133	Q
157	2	0.645465	-11.2247	1	0	0	20		12.44	Q
158	2	0.646069	-11.2207	1	0	0	1		0.199	Q
159	2	0.646674	-11.2201	1	0	0	2		0.427	Q
161	2	0.648029	-11.2194	1	0	0	5		2.801	Q
163	2	0.65019	-11.2181	1	0	0	8		5.758	Q
164	2	0.651581	-11.216	1	0	0	4		3.128	Q
169	2	0.68578	-11.7757	1	0	0	5		1.155	Cs
197	2	1.04571	-11.4216	2		9	13	22	22.462	HC
202	2	1.07926	-11.3819	1	1	1	0		0.349	H
207	2	1.15195	-11.3152	1	1	11	0		21.757	H
215	2	1.16822	-11.293	1	1	1	0		0.403	H
212	2	1.17072	-11.3	2		16	20	36	34.482	CH
216	2	1.17669	-11.2854	1	1	2	0		3.675	L
217	2	1.19997	-11.266	2		7	5	12	17.442	HC
221	2	1.23153	-10.6356	1	0	0	4		1.692	Q
226	2	1.28253	-11.1799	1	1	4	0		4.891	H
233	2	1.32647	-11.1347	1	1	1	0		0.373	H
237	2	1.39048	-11.0709	1	0	0	5		1.134	Cs
238	2	1.40714	-11.0566	1	1	7	0		9.43	L
239	2	1.41474	-11.0515	2		8	2	10	18.616	LC
240	2	1.44176	-11.0357	2		23	21	44	58.785	HC
241	2	1.45269	-11.015	2		11	7	18	23.549	LC
242	2	1.46867	-10.9997	1	1	14	0		26.178	L
243	2	1.48366	-10.9788	1	1	5	0		4.995	W
244	2	1.48603	-10.9756	1	1	2	0		1.963	H
245	2	1.49851	-10.9638	1	1	6	0		4.313	W
246	2	1.51933	-10.9457	1	1	9	0		14.193	L
249	2	1.52881	-10.935	1	1	6	0		9.67	L
255	2	1.59935	-10.8668	2		3	14	17	18.002	HC
258	2	1.61577	-10.8467	2		7	8	15	4.975	WC
262	2	1.639	-10.8243	2		7	3	10	7.75	HC
268	2	1.6785	-10.7862	2		7	7	14	12.73	HC
279	2	1.8212	-10.6402	1	0	0	6		1.175	Cs
280	2	1.82187	-10.6394	1	0	0	3		0.717	Cs
281	2	1.82271	-10.6385	1	0	0	1		0.299	Cs
282	2	1.82324	-10.6379	1	0	0	1		0.259	Cs
287	2	1.86812	-10.5936	1	0	0	7		2.27	Cs
292	2	1.98316	-10.4805	2		6	3	9	9.246	HC
293	2	2.02705	-10.4422	2		17	16	33	29.278	LC
295	2	2.05024	-10.4175	2		9	20	29	23.881	CW
304	2	2.17162	-10.2898	1	0	0	6		1.166	Cs
308	2	2.22254	-10.2506	1	1	21	0		43.203	H
311	2	2.28241	-10.1962	1	1	30	0		62.952	W
314	2	2.29165	-10.1776	1	1	13	0		29.191	W
317	2	2.29666	-10.1665	1	1	5	0		7.542	H
319	2	2.29909	-10.1633	1	1	3	0		4.433	H
321	2	2.30837	-10.158	1	1	12	0		18.964	H
323	2	2.31063	-10.1518	1	1	3	0		4.622	H
325	2	2.31882	-10.1448	1	1	6	0		9.013	W
327	2	2.32095	-10.1407	1	1	2	0		1.902	W
330	2	2.32591	-10.1382	1	1	6	0		10.805	W
333	2	2.33111	-10.1341	1	1	8	0		14.668	W
335	2	2.34697	-10.115	1	1	4	0		3.103	W
337	2	2.35147	-10.1104	1	1	4	0		2.889	W
340	2	2.35708	-10.105	1	1	3	0		3.357	W
342	2	2.36151	-10.1025	1	1	7	0		10.589	W
343	2	2.36635	-10.0985	1	1	8	0		13.358	W
345	2	2.37268	-10.0912	1	1	6	0		9.817	H
347	2	2.38292	-10.0859	1	1	15	0		27.688	H
349	2	2.39396	-10.0749	1	1	16	0		27.841	L
351	2	2.3997	-10.0651	1	1	7	0		13.292	L
353	2	2.42072	-10.0524	1	1	23	0		43.212	L
356	2	2.4249	-10.0379	1	1	4	0		5.926	W
358	2	2.42791	-10.0348	1	1	4	0		5.791	L
360	2	2.43934	-10.0296	2		18	18	36	28.003	HC
362	2	2.4475	-10.0147	1	1	3	0		4.034	W
363	2	2.45007	-10.0115	1	1	2	0		1.811	L
364	2	2.4584	-10.0095	1	1	15	0		24.31	L
366	2	2.46699	-9.99899	1	1	9	0		17.517	L
368	2	2.47406	-9.99304	1	1	11	0		21.555	L
371	2	2.47929	-9.98554	1	1	9	0		13.404	L
372	2	2.52867	-9.95141	1	1	27	0		68.292	H
422	2	3.42256	-9.04009	1	0	0	6		5.546	C
423	2	3.42642	-9.03792	1	0	0	12		11.612	C
424	2	3.42984	-9.03412	1	0	0	16		10.272	C
425	2	3.43195	-9.03078	1	0	0	6		5.828	R
426	2	3.44187	-9.02027	1	0	0	6		3.697	R
427	2	3.44778	-9.01411	1	0	0	4		2.798	R
445	2	3.62194	-8.84116	1	1	5	0		7.152	H
488	2	3.89881	-8.56281	1	0	0	9		1.849	Cs
490	2	3.97668	-8.48661	1	1	5	0		7.829	L
503	2	4.28716	-8.17741	1	1	6	0		12.466	W
509	2	4.39162	-7.47689	1	0	0	31		6.667	Q
510	2	4.39571	-7.47419	1	0	0	25		11.631	Q
511	2	4.39758	-7.47039	1	0	0	10		4.725	Q
512	2	4.39838	-7.46842	1	0	0	2		0.502	Q
528	2	4.53703	-7.92847	2		7	8	15	15.804	CH
532	2	4.61625	-7.25233	1	0	0	40		6.91	Q
533	2	4.6188	-7.24977	1	0	0	24		6.861	Q
534	2	4.62171	-7.24697	1	0	0	16		7.233	Q
546	2	4.83172	-7.62984	1	0	0	8		1.626	Cs
553	2	4.9016	-7.56091	1	1	4	0		5.014	L
556	2	4.93046	-7.53105	1	0	0	7		1.471	Cs
558	2	4.93489	-7.52723	1	1	3	0		3.628	L
566	2	5.04997	-7.41291	1	1	8	0		6.343	W
569	2	5.08042	-7.381	1	0	0	6		1.1	Cs
581	2	5.33419	-7.14328	1	1	23	0		58.882	H
595	2	5.54277	-6.3279	1	0	0	49		14.43	Q
596	2	5.54433	-6.32312	1	0	0	5		2.849	Q
597	2	5.54538	-6.32186	1	0	0	6		2.051	Q
598	2	5.54673	-6.32005	1	0	0	2		0.413	Q
601	2	5.56978	-6.89375	1	1	6	0		8.714	H
602	2	5.5709	-6.89037	1	1	1	0		0.6	H
603	2	5.60349	-6.85806	1	0	0	7		1.6	Cs
605	2	5.63392	-6.23588	1	0	0	44		11.268	Q
609	2	5.63794	-6.23227	1	0	0	21		12.749	Q
610	2	5.63844	-6.22826	1	0	0	1		0.128	Q
611	2	5.63906	-6.22771	1	0	0	2		0.399	Q
612	2	5.63988	-6.22703	1	0	0	3		0.869	Q
614	2	5.64038	-6.22641	1	0	0	2		0.427	Q
616	2	5.64115	-6.22568	1	0	0	3		0.584	Q
617	2	5.64173	-6.22517	1	0	0	3		0.855	Q
618	2	5.64209	-6.22462	1	0	0	1		0.157	Q
619	2	5.64255	-6.22424	1	0	0	2		0.47	Q
620	2	5.64324	-6.22357	1	0	0	2		0.499	Q
621	2	5.64395	-6.22306	1	0	0	2		1.254	Q
622	2	5.64478	-6.22212	1	0	0	3		0.826	Q
624	2	5.6456	-6.22146	1	0	0	2		1.425	Q
625	2	5.6461	-6.2206	1	0	0	1		0.128	Q
626	2	5.64662	-6.22018	1	0	0	2		0.47	Q
627	2	5.64724	-6.21947	1	0	0	1		0.143	Q
633	2	5.67824	-6.78329	1	0	0	5		1.5	Cs
634	2	5.68148	-6.18854	1	0	0	34		12.066	Q
635	2	5.68369	-6.18392	1	0	0	13		3.376	Q
637	2	5.68422	-6.18259	1	0	0	2		0.499	Q
638	2	5.68491	-6.18199	1	0	0	3		0.827	Q
649	2	5.9725	-6.49139	1	1	7	0		9.986	L
658	2	6.19234	-6.2736	2		7	5	12	17.397	HC
668	2	6.28914	-6.17682	2		10	5	15	17.465	LC
682	2	6.60813	-5.85436	2		7	8	15	4.934	WC
688	2	6.694	-5.77375	1	1	9	0		23.915	H
712	2	6.90162	-5.56091	1	1	4	0		5.115	L
715	2	6.92389	-5.53756	1	0	0	5		1.186	Cs
716	2	6.93493	-5.52722	1	1	2	0		3.743	L
717	2	6.97655	-5.48816	2		8	4	12	12.981	HC
734	2	7.10182	-5.35964	1	0	0	4		1.286	Cs
737	2	7.16565	-5.31089	1	1	22	0		55.545	H
739	2	7.18912	-5.27757	1	1	12	0		20.057	L
743	2	7.22207	-5.23937	1	0	0	5		1.186	Cs
746	2	7.25965	-5.20191	1	0	0	7		1.628	Cs
748	2	7.29907	-4.57413	1	0	0	56		23.516	Q
750	2	7.33417	-5.14327	1	1	23	0		58.797	H
759	2	7.34222	-5.12009	2		4	6	10	4.312	WC
768	2	7.433	-5.02848	1	0	0	5		1.305	Cs
769	2	7.43474	-5.02672	1	0	0	5		1.248	Cs
770	2	7.4377	-5.02377	1	0	0	5		1.276	Cs
772	2	7.45118	-5.01029	1	0	0	5		1.29	Cs
773	2	7.48745	-4.97437	1	1	2	0		2.566	H
774	2	7.48889	-4.97239	1	1	1	0		0.609	H
791	2	7.54774	-4.91374	1	0	0	5		1.347	Cs
797	2	7.60346	-4.85807	1	0	0	7		1.503	Cs
800	2	7.63907	-4.22776	1	0	0	2		0.57	Q
801	2	7.63987	-4.22703	1	0	0	3		0.84	Q
802	2	7.64062	-4.2264	1	0	0	3		1.268	Q
803	2	7.64114	-4.22568	1	0	0	3		0.556	Q
804	2	7.64258	-4.22518	1	0	0	6		3.932	Q
805	2	7.64325	-4.22357	1	0	0	2		0.541	Q
806	2	7.64396	-4.22307	1	0	0	2		1.296	Q
807	2	7.64478	-4.22212	1	0	0	3		0.841	Q
808	2	7.64562	-4.22146	1	0	2	0		1.481	Q
809	2	7.64665	-4.22018	1	0	0	2		0.57	Q
810	2	7.64724	-4.21947	1	0	0	1		0.142	Q
812	2	7.68152	-4.18877	1	0	0	39		13.034	Q
814	2	7.68368	-4.18392	1	0	0	13		3.362	Q
816	2	7.68421	-4.18258	1	0	0	2		0.442	Q
817	2	7.68493	-4.182	1	0	0	3		0.926	Q
827	2	7.79679	-4.66467	1	0	0	5		1.233	Cs
829	2	7.82478	-4.64194	2		13	13	26	20.198	HC
835	2	7.87954	-4.58208	1	0	0	7		1.844	Cs
837	2	7.90272	-4.56039	1	1	5	0		7.202	H
838	2	7.90383	-4.55744	1	1	1	0		0.567	H
846	2	7.97245	-4.49139	1	1	7	0		9.84	L
849	2	7.9792	-4.48581	1	1	10	0		14.024	L
851	2	7.98171	-4.48044	1	1	2	0		3.729	L
853	2	7.99372	-4.47155	1	1	6	0		14.977	L
855	2	8.04899	-4.42405	2		25	30	55	42.953	LC
856	2	8.05143	-4.40979	2		1	1	2	0.407	LC
863	2	8.14794	-4.31351	1	0	0	5		1.248	Cs
867	2	8.19235	-4.2736	2		7	5	12	17.435	HC
870	2	8.23019	-4.23406	1	1	6	0		11.311	H
871	2	8.23127	-4.23001	1	1	1	0		0.595	H
874	2	8.26403	-4.20633	1	1	16	0		33.308	W
875	2	8.2693	-4.19293	2		2	7	9	4.016	CsHK
877	2	8.32271	-4.1389	1	0	0	7		1.787	Cs
886	2	8.39081	-4.07314	2		7	7	14	10.224	HC
893	2	8.43172	-4.02986	1	0	0	7		1.688	Cs
897	2	8.47685	-3.9846	1	0	0	5		1.234	Cs
900	2	8.50731	-3.9602	2		4	20	24	23.039	CL
902	2	8.51539	-3.9527	2		13	18	31	25.139	CL
903	2	8.51806	-3.94318	2		1	1	2	0.459	LC
905	2	8.60814	-3.85432	2		7	7	14	4.868	WC
907	2	8.64061	-3.82086	1	0	0	6		1.276	Cs
911	2	8.6643	-3.79729	1	0	0	7		1.744	Cs
913	2	8.68493	-3.77797	1	1	4	0		6.423	H
915	2	8.694	-3.77374	1	1	9	0		23.853	H
923	2	8.73677	-3.73041	2		7	10	17	21.845	CW
924	2	8.76442	-3.70219	1	1	8	0		19.787	W
931	2	8.87329	-3.58831	1	0	0	7		1.759	Cs
932	2	8.89046	-3.57261	2		4	4	8	7.052	LC
933	2	8.92753	-3.53398	1	0	0	5		1.424	Cs
939	2	8.97654	-3.48816	2		7	3	10	12.927	HC
942	2	9.04263	-3.42189	2		14	14	28	12.272	WC
953	2	9.08383	-3.37764	1	0	0	5		1.303	Cs
970	2	9.23601	-3.22677	1	1	4	0		6.036	H
973	2	9.27595	-3.18576	1	0	0	9		2.145	Cs
987	2	9.31139	-3.15022	1	0	0	8		1.805	Cs
997	2	9.32897	-3.13589	2		6	7	13	13.514	CH
999	2	9.33474	-3.12672	1	0	0	5		1.263	Cs
1001	2	9.34219	-3.1201	2		4	4	8	4.241	WQ
1008	2	9.36279	-3.0987	1	0	0	5		1.364	Cs
1011	2	9.37194	-2.49505	1	0	0	4		1.169	Q
1012	2	9.37427	-2.49419	1	0	0	12		6.453	Q
1013	2	9.37625	-2.49168	1	0	0	8		4.53	Q
1014	2	9.37809	-2.48938	1	0	0	5		2.878	Q
1015	2	9.37891	-2.48789	1	0	0	2		0.499	Q
1016	2	9.38163	-2.48722	1	0	0	11		7.834	Q
1017	2	9.38315	-2.48429	1	0	0	5		2.778	Q
1018	2	9.38395	-2.48289	1	0	0	2		0.626	Q
1019	2	9.4346	-3.02933	2		6	11	17	10.137	CH
1020	2	9.44706	-3.01897	2		12	10	22	17.736	LC
1026	2	9.49637	-2.9651	1	0	0	5		1.303	Cs
1036	2	9.5854	-2.87683	2		3	3	6	4.049	HC
1038	2	9.6092	-2.85444	2		9	10	19	9.088	CW
1047	2	9.67209	-2.79368	2		6	11	17	16.772	CH
1048	2	9.68572	-2.77576	1	0	0	5		1.343	Cs
1049	2	9.6894	-2.77484	1	1	7	0		11.269	H
1053	2	9.72853	-2.73303	1	0	0	6		1.584	Cs
1058	2	9.80763	-2.65394	1	0	0	7		1.624	Cs
1059	2	9.8248	-2.64193	2		13	14	27	20.24	HC
1061	2	9.8445	-2.61694	1	0	0	4		1.163	Cs
1062	2	9.84941	-2.61211	1	0	0	7		1.464	Cs
1063	2	9.90928	-2.55222	1	0	0	5		1.403	Cs
1066	2	9.97575	-2.48581	1	0	0	7		1.604	Cs
1068	2	10.0373	-2.42422	1	0	0	5		1.384	Cs
1071	2	10.0453	-1.8214	1	0	0	1		0.243	Q
1070	2	10.0456	-2.41901	2		7	7	14	12.626	LC
1072	2	10.046	-1.82088	1	0	0	7		0.898	Q
1073	2	10.0469	-1.82037	1	0	0	7		2.137	Q
1074	2	10.0485	-1.8195	1	0	0	11		4.658	Q
1075	2	10.0499	-1.81756	1	0	0	7		3.034	Q
1085	2	10.141	-2.32395	2		9	11	20	13.689	HC
1086	2	10.1637	-2.30697	2		14	33	47	34.576	CHWL
1091	2	10.2771	-2.1891	2		9	9	18	18.17	HC
1092	2	10.2805	-2.18177	2		2	2	4	3.986	HC
1098	2	10.3698	-2.09162	1	0	0	5		1.203	Cs
1107	2	10.5611	-1.90036	1	0	0	5		1.263	Cs
1110	2	10.6046	-1.85689	1	0	0	5		1.264	Cs
1116	2	10.6414	-1.82013	1	0	0	5		1.444	Cs
1119	2	10.7162	-1.74658	1	0	0	6		6.184	C
1120	2	10.7178	-1.74352	1	0	0	1		0.641	Cs
1122	2	10.7319	-1.73345	2		8	9	17	15.257	HC
1127	2	10.8338	-1.63308	1	1	11	0		20.729	H
1129	2	10.8692	-1.59221	1	0	0	4		1.243	Cs
1135	2	10.9796	-1.4821	1	0	0	8		1.965	Cs
1136	2	10.9991	-1.46469	2		6	6	12	9.733	HC
1138	2	11.0404	-1.42104	1	0	0	5		1.203	Cs
1141	2	11.1137	-0.754555	1	0	0	9		5.854	Q
1143	2	11.1342	-1.33129	2		7	7	14	15.805	HC
1144	2	11.1433	-1.3182	1	0	0	5		1.383	Cs
1152	2	11.2821	-1.18496	2		9	21	30	21.596	CW
1157	2	11.3355	-1.13098	1	1	6	0		19.188	H
1156	2	11.3367	-1.13949	2		16	36	52	54.225	CH
1158	2	11.3373	-1.12401	1	1	1	0		0.742	H
1164	2	11.4415	-0.425377	1	0	0	3		0.612	Q
1165	2	11.4425	-0.424431	1	0	0	3		0.897	Q
1166	2	11.446	-0.420882	1	0	0	3		0.626	Q
1170	2	11.4791	-0.387871	1	0	0	6		1.168	Q
1192	2	11.6507	-0.810805	1	0	0	7		1.564	Cs
1197	2	11.812	-0.662881	2		7	41	48	49.391	CsHLK
1203	2	12.048	-0.416498	2		8	5	13	12.026	LC
1208	2	12.2281	-0.235932	2		5	14	19	10.37	CH
1211	2	12.4131	-0.0516361	2		8	8	16	13.214	HC
1212	2	12.6377	0.170951	2		10	10	20	20.363	HC
4	3	-1.00685	-13.4781	1	1	14	0		36.335	W
5	3	-1.00367	-13.4663	1	1	3	0		5.518	W
6	3	-1.00103	-13.4631	1	1	5	0		3.379	W
7	3	-0.997768	-13.4599	1	1	5	0		3.578	W
8	3	-0.983614	-13.4557	1	1	25	0		39.335	H
11	3	-0.975157	-13.4382	1	1	6	0		7.001	L
12	3	-0.962428	-13.4352	1	1	25	0		41.965	L
13	3	-0.943837	-13.4067	1	1	4	0		6.274	W
15	3	-0.920175	-13.403	1	1	44	0		78.289	H
17	3	-0.88299	-13.3444	1	0	0	5		1.155	Cs
20	3	-0.857327	-13.326	1	1	16	0		27.342	H
22	3	-0.808109	-13.2712	1	1	8	0		7.143	W
23	3	-0.79928	-13.266	1	1	11	0		20.014	H
24	3	-0.796848	-13.2596	1	1	4	0		5.974	H
25	3	-0.782528	-12.6508	1	0	0	21		5.957	Q
26	3	-0.77123	-13.2331	1	1	4	0		2.837	W
27	3	-0.768929	-13.2311	1	1	3	0		3.892	W
28	3	-0.761951	-13.2286	1	1	12	0		20.058	H
30	3	-0.750214	-13.2117	1	0	0	6		1.312	Cs
31	3	-0.726923	-13.1907	1	1	5	0		9.767	W
32	3	-0.724933	-13.1869	1	1	2	0		3.193	W
34	3	-0.66442	-12.5315	1	0	0	5		1.593	Q
40	3	-0.58122	-13.0582	1	1	31	0		57.04	L
43	3	-0.563353	-13.0367	1	1	22	0		44.034	W
45	3	-0.551052	-12.4215	1	0	0	70		13.644	Q
46	3	-0.521231	-12.9996	1	1	32	0		62.193	L
48	3	-0.487124	-12.9519	1	1	8	0		13.104	L
49	3	-0.480944	-12.9471	1	1	11	0		18.292	L
51	3	-0.470469	-12.932	1	0	0	6		1.369	Cs
54	3	-0.396048	-12.8575	1	0	0	6		1.326	Cs
58	3	-0.234642	-12.6961	1	0	0	5		1.183	Cs
59	3	-0.181095	-12.6494	1	0	0	29		25.952	C
61	3	-0.176561	-12.6412	1	0	0	11		12.647	C
79	3	0.206251	-12.2579	1	1	7	0		10.879	H
86	3	0.244656	-12.2204	1	1	7	0		14.083	H
90	3	0.267901	-12.1947	2		3	3	6	5.252	HC
98	3	0.279759	-12.1818	1	0	0	8		1.554	Cs
92	3	0.280077	-12.1916	2		16	11	27	37.998	HC
99	3	0.284963	-12.1795	2		5	5	10	12	HC
100	3	0.300019	-12.1625	2		3	2	5	5.246	HC
101	3	0.301632	-12.1597	2		1	1	2	0.684	HC
102	3	0.316218	-12.156	2		20	6	26	40.147	HC
105	3	0.319261	-12.1422	1	0	0	5		1.269	Cs
106	3	0.351261	-12.115	1	1	11	0		18.459	L
107	3	0.352686	-12.1088	1	0	0	7		1.512	Cs
108	3	0.369736	-12.1038	2		25	15	40	44.85	LC
109	3	0.384177	-12.0816	2		12	9	21	16.902	LC
110	3	0.384842	-11.4832	1	0	0	33		4.834	Q
114	3	0.407156	-12.0566	1	1	7	0		9.498	L
120	3	0.449295	-12.014	2		5	12	17	7.798	CW
126	3	0.463838	-11.9997	1	1	6	0		8.746	L
122	3	0.46409	-12.0087	2		24	14	38	41.944	WC
127	3	0.466283	-11.9976	1	1	5	0		9.981	H
134	3	0.483659	-11.9789	1	1	5	0		5.048	W
135	3	0.486018	-11.9756	1	1	2	0		1.911	H
136	3	0.518036	-11.9462	2		6	6	12	11.39	HC
137	3	0.528803	-11.935	1	1	6	0		9.682	L
140	3	0.53743	-11.9257	2		3	5	8	7.391	WC
143	3	0.55822	-11.916	2		23	83	106	47.052	CL
152	3	0.619977	-11.8422	1	1	3	0		3.936	L
154	3	0.626011	-11.8398	1	1	8	0		17.067	W
162	3	0.649994	-11.813	1	1	4	0		6.816	H
165	3	0.652418	-11.8101	1	1	3	0		5.218	H
166	3	0.657332	-11.8061	1	1	4	0		8.398	H
167	3	0.659263	-11.802	1	1	1	0		0.513	H
168	3	0.67383	-11.7881	1	1	2	0		2.794	H
170	3	0.689972	-11.7719	1	1	2	0		2.852	H
171	3	0.70577	-11.7595	1	1	7	0		15.1	H
173	3	0.708498	-11.7544	1	1	3	0		6.459	H
175	3	0.725534	-11.7365	1	1	2	0		3.165	W
176	3	0.733425	-11.7291	1	1	3	0		5.204	H
186	3	0.821179	-11.6403	1	0	0	6		1.183	Cs
187	3	0.830293	-11.6336	1	1	5	0		10.027	H
188	3	0.831517	-11.6297	1	1	1	0		0.499	H
196	3	1.0457	-11.4222	2		11	11	22	24.563	HC
213	3	1.17071	-11.3	2		16	19	35	34.445	CH
224	3	1.27053	-11.2039	2		20	40	60	47.802	CH
259	3	1.62009	-10.8457	2		9	3	12	16.958	LC
261	3	1.63899	-10.8243	2		4	7	11	7.811	HC
285	3	1.84709	-10.6156	2		2	7	9	5.815	CsHK
289	3	1.9067	-10.5642	1	1	17	0		35.092	W
294	3	2.02552	-9.84249	1	0	0	37		4.849	Q
302	3	2.14935	-10.3122	1	0	0	7		1.469	Cs
305	3	2.20698	-10.2545	1	0	0	4		1.412	R
306	3	2.20757	-10.2539	1	0	0	2		1.454	R
307	3	2.21018	-10.2529	1	0	0	7		7.062	R
310	3	2.28244	-10.1962	1	1	30	0		63.08	W
315	3	2.2883	-10.1776	1	1	9	0		17.111	W
316	3	2.29166	-10.1718	1	1	4	0		8.484	W
318	3	2.29667	-10.1665	1	1	5	0		7.571	H
320	3	2.29908	-10.1633	1	1	3	0		4.406	H
322	3	2.3084	-10.158	1	1	12	0		18.98	H
324	3	2.31062	-10.1518	1	1	3	0		4.549	H
326	3	2.31887	-10.1448	1	1	6	0		9.183	W
328	3	2.32097	-10.1407	1	1	2	0		1.939	W
329	3	2.32449	-10.1382	1	1	4	0		5.704	W
331	3	2.32594	-10.1358	1	1	2	0		2.239	W
332	3	2.33166	-10.1341	1	1	9	0		16.652	W
336	3	2.34695	-10.115	1	1	4	0		3.008	W
338	3	2.35145	-10.1104	1	1	4	0		2.794	W
339	3	2.35708	-10.105	1	1	3	0		3.408	W
341	3	2.36154	-10.1025	1	1	7	0		10.689	W
344	3	2.3664	-10.0985	1	1	8	0		13.518	W
346	3	2.37271	-10.0912	1	1	6	0		9.924	H
348	3	2.38292	-10.0859	1	1	15	0		27.682	H
350	3	2.39396	-10.0749	1	1	15	0		27.801	L
352	3	2.39972	-10.0651	1	1	7	0		13.34	L
354	3	2.40921	-10.0524	1	1	2	0		1.74	L
355	3	2.42071	-10.0511	1	1	21	0		38.36	L
357	3	2.42485	-10.0378	1	1	4	0		5.675	W
359	3	2.42794	-10.0348	1	1	4	0		5.761	L
361	3	2.43731	-10.0272	1	1	9	0		12.076	H
365	3	2.45841	-10.0094	1	1	15	0		24.219	L
367	3	2.46699	-9.99897	1	1	9	0		17.478	L
369	3	2.46976	-9.993	1	1	4	0		5.917	L
370	3	2.47405	-9.99053	1	1	7	0		12.469	L
374	3	2.59251	-9.86893	1	0	0	5		1.169	Cs
386	3	2.75357	-9.7127	1	1	9	0		18.589	L
395	3	2.78639	-9.67503	1	0	0	6		1.126	Cs
397	3	2.98113	-9.48208	1	1	5	0		7.586	L
398	3	3.00238	-9.46335	1	1	11	0		16.64	H
399	3	3.00495	-9.45704	1	1	2	0		3.172	H
404	3	3.02706	-9.44216	2		16	16	32	29.165	LC
[truncated: 3,935 more rows]

## Sheet: Description
Column	Description
Bout_No	No of bout event in database (referenciat to sound files)
Pair_code	No o focal pairs (1-18) or unrecognized neighbour (0)
HR_to_Dawn	Time (hr) relative to sunrize (=0)
HR_to_Dusk	Time (hr) relative to sunset (=0)
Solo_or_Duet	Bout of solo (1) or duet (2)
M_or_F_solo	Bout of female (0) or male (1) solo
M_phrases	Number pf phrases sung by a male
F_phrases	Number of phrases sung by a female
Phreases_in_duets	Number of female and male phrases sung in a duet
Duration	Duration (s) of bout
Bout_code	Code describing song or call phrases used by birds in a bout:
	H = High hwee-oo
	L = Low hwee-oo
	W = Hwee-hwee
	C = Chock
	Cs = Chock-series
	K = Kee-roo
	Q = Keck
	R = Rasp
	How to read Bout_codes:
	eg. CsHC means that females started duet with Chock-series and then male produced High Hwee-oo phrase, and female Chock phrase in alternating way
